# Supplementary material
Source: publisher figshare collection journal article supplement (https://rs.figshare.com/ndownloader/files/38311431)
Supplement: Supplementary file 1 [file 38311431]

Orthoester Formation in Fungal Meroterpenoid Austalide F Biosynthesis

Takayoshi Awakawa,1,2,3† Wei Liu,1,† Tongxuan Bai,1 Tomo Taniguchi,1 and Ikuro Abe1,2

1 Graduate School of Pharmaceutical Sciences, The University of Tokyo, 7-3-1 Hongo, Bunkyo-ku, Tokyo 113-0033, Japan

2 Collaborative Research Institute for Innovative Microbiology, The University of Tokyo, Yayoi 1-1-1, Bunkyo-ku, Tokyo 113-8657, Japan

3 RIKEN Center for Sustainable Resource Science, Wako, Saitama 351-0198, Japan

†These authors contributed equally.

Authors for correspondence:

T. Awakawa ([awakawa@mol.f.u-tokyo.ac.jp](file:///Users/awakawatakayoshi/Library/Containers/com.apple.mail/Data/Library/Mail%20Downloads/0DAEEE39-B51D-4CD1-B3E5-D735E4FA0D74/awakawa@mol.f.u-tokyo.ac.jp)) and I. Abe ([abei@mol.f.u-tokyo.ac.jp](mailto:abei@mol.f.u-tokyo.ac.jp))

**Table of Contents**

**Supplementary Material and Methods S2-S5**

**Analytical Data S6-S7**

**Supplementary Tables S8-S22**

**Supplementary Figures S23-S42**

**Supplementary References S43-S44**

**Supplementary Materials and Methods**

**General:** Solvents and chemicals were purchased from Sigma-Aldrich, Wako Chemicals Ltd., or Kanto Chemical Co., Inc., unless noted otherwise. Oligonucleotide primers were purchased from Eurofins Genetics, and were listed in Table S1. PCR was performed using a TaKaRa PCR Thermal Cycler Dice® Gradient (TaKaRa), with Prime STAR Max DNA Polymerase (TaKaRa). Sequence analyses were performed by Eurofins Genetics. HPLC analysis was performed on a Shimadzu Prominence HPLC system with a TSK-gel ODS-80TS column (4.6 i.d. x 150 mm; Tosoh Co. Ltd.). NMR spectra were obtained at 500 MHz (1H)/125 MHz (13C) with a JEOL ECX-500 or ECZ-500 spectrometer or at 900 MHz (1H)/225 MHz (13C) with a Bruker Avance III HD 900 MHz NMR spectrometer at RIKEN Yokohama, and chemical shifts were recorded with reference to solvent signals (1H NMR: CDCl3 7.26 ppm, CD3CN 1.94 ppm; 13C NMR: CDCl3 77.0 ppm, CD3CN 118.26 ppm). The LC-MS analysis was performed on a Bruker Compact qTOF mass spectrometer with a Shimadzu Prominence HPLC system, using a COSMOSIL 5C18-AR-II column (2.0 mm I.D. × 150 mm, Nacalai Tesque, Inc., Kyoto, Japan). The glufosinate solution for the fungal transformation was extracted from Basta (Bayer), as previously described, [1]and used at a 50 µL/mL concentration.

**Strains and media:** *A. oryzae* NSAR1 (*niaD-, sC-, ΔargB, adeA-*) [2]were used as hosts for fungal expression. The transformation of *A. oryzae* NSAR1 was done by protoplast-PEG method. Transformants of the *A. oryzae* strains were grown in 10 mL DPY with 0.01% adenine as preculture, and transferred into the 200 mL DPY and adenine for 4 days. 1-mL of supernatant was adjusted at pH 3.0, and extracted by ethyl acetate twice, and cells were extracted by actone. The residues were dissolved with methanol, and injected to HPLC analysis.

**Construction of fungal expression plasmids:**For the construction of fungal expression plasmids for *ast* genes, all of the genes were amplified from *Penicillium arizonense* IBT12289T genomic DNA, with the primers listed in Tables S2 and S3. The full-length geneswere purified, and ligated into the pTAex3 [3] vector while *astE* was ligated into the pUSA [4] vector, using an In-Fusion® HD Cloning Kit (Clontech), according to the manufacturer’s protocol (Table S3). For the introduction of the other genes into pAdeA,[5] pBARI,[6] and pPTRI,[7] the fragment encoding the *amyB* promoter (*PamyB*) and the *amyB* terminator (*TamyB*) was amplified from the pTAex3-based plasmids and ligated into the promoter/terminator-free vectors, using an In-Fusion® HD Cloning Kit, as summarized in Table S2. These plasmids were used to transform *A. oryzae* NSAR1 by the protoplast–polyethylene glycol method (Table S3).

**Construction of *Escherichia coli* expression plasmids:** The full-length *astB, astI* and *astK* genes were amplified from the template plasmids pUNA-astB, pUNA-astI and pUNA-astK, with the primers listed in Table S1, and individually ligated into the pQTeV vector linearized by BamHI and HindIII cleavage using an In-Fusion® HD Cloning Kit to yield the E. coli expression vectors pQTev-astB, pQTev-astI and pQTev-astK, respectively. The cDNA of astL gene was amplified from the template plasmids pQTev-astL, with the primers listed in Table 5-1, and ligated into the pET22 vector linearized by NdeI and HindIII, using an In-Fusion® HD Cloning Kit to yield the E. coli expression vector pET22-astL. For the protein expression, *E. coli* BL21 was transformed with the constructed plasmids. Each transformant was incubated in LB medium, at 37 °C/200 rpm for 18 h. Gene expression was induced by the addition of 0.1 mM IPTG when the OD600 reached 0.6-0.8, followed by further incubation with shaking at 200 rpm at 16 °C for 20 h. The cells were harvested by centrifugation, resuspended in lysis buffer (50 mM Tris-HCl, 300 mM NaCl, 5 mM imidazole, 5% glycerol, pH 8.0), and lysed on ice by sonication. After centrifugation, the supernatant was applied to a Ni-NTA affinity column, which was washed with 50 column volumes of wash buffer (50 mM Tris-HCl, 300 mM NaCl, 20 mM imidazole, 5% glycerol, pH 8.0). The His-tagged protein was eluted with 5 column volumes of elution buffer (50 mM Tris-HCl, 300 mM NaCl, 300 mM imidazole, 5% glycerol, pH 8.0). The protein concentrations of AstB, AstI, AstK, and AstL were determined using a Nanodrop spectrometer (GE healthcare Life Science).

**HPLC analysis of each product:** Metabolites isolated from medium or mycelium of *A. oryzae* transformants were analyzed by HPLC using TSK-gel ODS-80TS column (4.6 i.d. x 150 mm; Tosoh Co. Ltd.), with a solvent system of 0.1% formic acid (solvent A) and acetonitrile containing 0.1% formic acid (solvent B), at a flow rate of 1.0 ml/min and a column temperature of 40 °C. Separation was performed with a linear gradient from 10% solvent B to 100% solvent B for 20 min, holds for 4 min, goes back to 10% solvent B in 1 min, and then holds for 5 min.

**Isolation and Purification of Metabolites from *A. oryzae* Transformants**

**Purification conditions for compound 4’**:The EtoAc extract from medium and acetone extract from the homogenized mycelium of a 2 L culture of *A. oryzae/astEAGDF* was subjected to silica-gel column chromatography, and eluted stepwise with a chloroform:methanol gradient (100:0 to 100:20). The 1 L x 3 EtoAc was used to extract 1 L medium. Fractions that contained **4’** were further purified by reverse-phase preparative HPLC (45% aqueous acetonitrile containing 0.1% formic acid, 3.0 mL/min) with COSMOSIL 5C18-AR-II column (10 mm i.d. x 250 mm; Nacalai Tesque, Inc.) to yield 3.9 mg **4’** of white solid, respectively.

**Purification conditions for compound 5 and 6** :The EtoAc extract from medium and acetone extract from the homogenized mycelium of a 8 x 1 L culture of *A. oryzae/astEAGLHJC* was subjected to silica-gel column chromatography, and eluted stepwise with a chloroform:methanol gradient (100:0 to 95:5). The 1 L x 3 EtoAc was used to extract 1 L medium. Fractions that contained **5** and **6** were further purified by reverse-phase preparative HPLC (70% aqueous acetonitrile containing 0.1% formic acid, 2.5 mL/min) with COSMOSIL 5C18-AR-II column (10 mm i.d. x 250 mm; Nacalai Tesque, Inc.) to yield 10.0 mg **6** of white solid, and 20.0 mg **5** of white solid, respectively.

**Purification conditions for compound 6’**: The EtoAc extract from medium and acetone extract from mycelium of a 5 x 100 mL culture of *A. oryzae/astEAGLHJC* was subjected to silica-gel column chromatography, and eluted stepwise with a chloroform:methanol gradient (100:0 to 95:5). The 100 mL x 3 EtoAc was used to extract 100 mL medium. Fractions that contained **6’** were further purified by reverse-phase preparative HPLC (60% aqueous acetonitrile containing 0.1% formic acid, 2.5 mL/min) with COSMOSIL 5C18-AR-II column (10 mm i.d. x 250 mm; Nacalai Tesque, Inc.) to yield 3.0 mg **6’** of white solid,

**Purification conditions for compound 5’ and 7:**The EtoAc medium extract from 12 x 1 L culture of *A. oryzae/astEAGLFHJCD* (not from mycelium) was subjected to silica-gel column chromatography, and eluted stepwise with a chloroform: methanol gradient (100:0 to 95:5). The 1 L x 3 EtoAc was used to extract 1 L medium. Fractions that contained **5’** and **7** were further purified by reverse-phase preparative HPLC (60% aqueous acetonitrile containing 0.1% formic acid, 2.5 mL/min) with COSMOSIL 5C18-AR-II column (10 i.d. x 250 mm; Nacalai Tesque, Inc.) to yield 22.7 mg **7** of white solid, and 25.3 mg **5’** of white solid, respectively.

**Enzymatic reaction assay of AstB, AstI, AstK, AstD and AstL:** The enzymatic reactions were performed in a 50 μL reaction mixture, containing 50 mM Tris-HCI (pH 8.0), 200 μM FeSO4, 0.2 mM of substrate, 5 mM α-ketoglutarate, 4 mM ascorbate, 1 mM SAM and 20 μM of AstB, AstI, AstK, and AstL. The reaction mixture was incubated at 30 °C for 3 hours, and then the reaction was quenched by adding 100 μL of ethyl acetate. After evaporation and re-dissolution, the products from each reaction were analyzed by HPLC.

**Isolation of the products from in vitro enzymatic reactions:**

50 mM Tris-HCI (pH 8.0), 200 μM FeSO4, 0.4 mM of **8**, 5 mM α-ketoglutarate, 4 mM ascorbate, 15 μM AstI, were performed in a 250 μL reaction mixture by 120 times. The enzyme reaction product was freeze-dried, dissolved in MeOH, and then purified by reverse-phase preparative HPLC (60 % aqueous acetonitrile, 3.0 mL/min) with COSMOSIL 5C18-AR-II column (10 mm i.d. x 250 mm; Nacalai Tesque, Inc.) to 2.5 mg of **9**.

50 mM Tris-HCI (pH 8.0), 200 μM FeSO4, 0.4 mM of **9**, 5 mM α-ketoglutarate, 4 mM ascorbate, 15 μM AstB, were performed in a 250 μL reaction mixture by 108 times. The enzyme reaction product was freeze-dried, dissolved in MeOH, and then purified by reverse-phase preparative HPLC (60 % aqueous acetonitrile, 3.0 mL/min) with COSMOSIL 5C18-AR-II column (10 mm i.d. x 250 mm; Nacalai Tesque, Inc.) to 2.0 mg of **10**.

50 mM Tris-HCI (pH 8.0), 0.4 mM of **10**, 1 mM SAM, 30 μM AstL, were performed in a 250 μL reaction mixture by 76 times. The enzyme reaction product was freeze-dried, dissolved in MeOH, and then purified by reverse-phase preparative HPLC (60 % aqueous acetonitrile, 3.0 mL/min) with COSMOSIL 5C18-AR-II column (10 mm i.d. x 250 mm; Nacalai Tesque, Inc.) to 2.5 mg of **11**.

50 mM Tris-HCI (pH 8.0), 200 μM FeSO4, 0.4 mM of **11**, 5 mM α-ketoglutarate, 4 mM ascorbate, 15 μM AstK, were performed in a 250 μL reaction mixture by 59 times. The enzyme reaction product was freeze-dried, dissolved in MeOH, and then purified by reverse-phase preparative HPLC (60 % aqueous acetonitrile, 3.0 mL/min) with COSMOSIL 5C18-AR-II column (10 mm i.d. x 250 mm; Nacalai Tesque, Inc.) to 1.0 mg of **12**.

**The Baeyer-Villiger oxidation of 7** [8]

To a stirred solution of **7** (3.0 mg, 7.2 mmol) and sodium bicarbonate (3.0 mg, 36 mmol) in CH2Cl2 (125 µL) were added m-chloroperbenzoic acid (mCPBA, 7.6 mg, 28.8 mmol). After the incubation at RT overnight, the reaction was washed with saturated aqueous potassium carbonate solution. Each washing was extracted with CH2Cl2, and the extract was evaporated to dryness. The residue was purified by HPLC chromatography using COSMOSIL 5C18-AR-II column (10 mm i.d. x 250 mm; Nacalai Tesque, Inc.), with a solvent system of 0.1% formic acid (solvent A) and acetonitrile containing 0.1% formic acid (solvent B), at a flow rate of 3.0 ml/min. Separation was performed with a linear gradient from 30% solvent B to 100% solvent B for 19 min, and goes back to 30% solvent B in 1 min, and then holds for 5 min. Finally, the purification affords compound **8** as a white solid (3.0 mg, 97%). The NMR data are summarized in Table S10.

**Analytical data**

**10’,11’-dihydroxyfarnesyl-DHMP (4’)** White solid; [α]23D 0.01 (*c* 0.33, CH3OH); For NMR data see Table S4 and Figures S7-S11. HRMS (ESI) *m*/*z*: [M + H]+ Calcd for C24H33O5 419.2432; Found 419.2428.

**Austalide S (5)** White solid; [α]23D -7.79 (*c* 0.17, CHCl3); For NMR data see Table S5 and Figures S12-S16. HRMS (ESI) *m*/*z*: [M + H]+ Calcd for C24H33O5 401.2323; Found 401.2318. The NMR data and optical rotation value are in good agreement with the reported data [9].

**dihydroaustalide K (5’)** White solid; [α]23D -46.1 (*c* 0.17, MeOH); For NMR data see Table S8 and Figures S24-S25. HRMS (ESI) *m*/*z*: [M + H]+ Calcd for C24H31O5 415.2479; Found 415.2474. The NMR data and optical rotation value are in good agreement with the reported data[10].

**Austalide V (6)** White solid; [α]23D -11.9 (*c* 0.08, CHCl3); For NMR data see Table S6 and Figures S17-S18. HRMS (ESI) *m*/*z*: [M + H]+ Calcd for C24H31O5 399.2166; Found 399.2161. The NMR data and optical rotation value are in good agreement with the reported data[11].

**2*R*-hydroxyaustalide V (6’)**White solid; [α]23D -2.84 (*c* 0.833, CHCl3); For NMR data see Table S7 and Figures S19-S23. HRMS (ESI) *m*/*z*: [M - H]- Calcd for C24H29O6 419.1970; Found 419.1973.

**Austalide K(7)** White solid; [α]23D -29.7 (*c* 0.67, CHCl3); For NMR data see Table S9 and Figures S26-S27. HRMS (ESI) *m*/*z*: [M + H]+ Calcd for C25H33O5 413.2323; Found 413.2319. The NMR data and optical rotation value are in good agreement with the reported data[8].

**13-deacetoxyaustalide I (8)** White solid; [α]23D +0.832(*c* 0.25, MeOH); For NMR data see Table S10 and Figures S28-S29. HRMS (ESI) *m*/*z*: [M + H]+ Calcd for C25H33O6 429.2272; Found 429.2269. The NMR data and optical rotation value data are in good agreement with the reported data[8].

**13-*O*-deacetylaustalide I (9)** White solid; [α]23D -117 (*c* 0.125, CHCl3); For NMR data see Table S11 and Figures S30. HRMS (ESI) *m*/*z*: [M + H]+ Calcd for C25H33O7 445.2221; Found 445.2214. The NMR data and optical rotation value data are in good agreement with the reported data[10].

**Austalide T (10)**  White solid; [α]23D -4.40 (*c* 0.08, CHCl3); For NMR data see Table S12 and Figures S31-S32. HRMS (ESI) *m*/*z*: [M + H]+ Calcd for C25H33O8 461.2170; Found 461.2187. The NMR data and optical rotation value data are in good agreement with the reported data[9].

**Austalide B (11)** White solid; [α]23D -3.90 (*c* 1.00, CHCl3); For NMR data see Table S13 and Figures S33-S34. HRMS (ESI) *m*/*z*: [M + H]+ Calcd for C26H35O8 475.2326; Found 475.2325. The NMR data and optical rotation value data are in good agreement with the reported data[13].

**Austalide F (12)** White solid; [α]23D -6.07 (*c* 0.17, CHCl3); For NMR data see Table S14 and Figures S35-S36. HRMS (ESI) *m*/*z*: [M + H]+ Calcd for C26H35O9 491.2276; Found 491.2274. The NMR data and optical rotation value data are in good agreement with the reported data [14].

Table S1. Primers used in this study

| **Primer** | **Sequence (5' to 3')** |
| --- | --- |
| AstA-F | TCGAGCTCGGTACCCATGACCATTCAAGACAACATAGAT |
| AstA-R | CTACTACAGATCCCCTCAATGCCTCCCCAAATCCTCA |
| AstB-F1 | TCGAGCTCGGTACCCATGACCGTCCCTACTACCG |
| AstB-R1 | CTACTACAGATCCCCCTACTGATCGAGCTTGGGCTGAAGC |
| AstB-F2 | TTATTTTCAGGGATCCATGACCGTCCCTACTACCGTCC |
| AstB-R2 | TCAGCTAATTAAGCTTCTACTGATCGAGCTTGGGCTGAAGC |
| AstC-F | TCGAGCTCGGTACCCATGACCATATCTTTTGAAGTATGCT |
| AstC-R | CTACTACAGATCCCCTCATTCCAAGTATGTCAGGTGGA |
| AstD-F | TCGAGCTCGGTACCCATGGAGGAACTCATCAGCCAG |
| AstD-R | CTACTACAGATCCCCTCATGCCGCTTTCACTGCTA |
| AstE-F | TCGAGCTCGGTACCCATGAGGTTATGCACAGAGTGC |
| AstE-R | CTACTACAGATCCCCTTCCTAGAGGCGGACGTGC |
| AstF-F | TCGAGCTCGGTACCCAATGTCCGAGGTAAAGTTCAAAGT |
| AstF-R | CTACTACAGATCCCCTCTACCCTCTGAATGCAATCGTC |
| AstG-F | TCGAGCTCGGTACCCATGGGCCGTCATTCATCG |
| AstG-R | CTACTACAGATCCCCTTAAACAGTGTCCCAGAAC |
| AstH-F | TCGAGCTCGGTACCCATGGACTGGTTTATTGGTGC |
| AstH-R | CTACTACAGATCCCCTTATCGTTTCTTGTCGGCAAGG |
| AstI-F | TCGAGCTCGGTACCCATGCAACGCCTTTCGGC |
| AstI-R | CTACTACAGATCCCCTTAATTTTTGTAACCATTCGTCGGAAGG |
| AstI-F2 | TTATTTTCAGGGATCCATGCAACGCCTTTCGGCAAC |
| AstI-R2 | TCAGCTAATTAAGCTTAATTTTTGTAACCATTCGTCGG |
| AstJ-F | TCGAGCTCGGTACCCATGGGATTACTTCAAGGCCGA |
| AstJ-R | CTACTACAGATCCCCCTAGATTGTCGACCAGGC |
| AstK-F | TCGAGCTCGGTACCCATGACTCGTCCCGACCC |
| AstK-R | TTCGAGGAGCTTTGATCACATCCCGTTGCCCAGC |
| AstK-F2 | TTATTTTCAGGGATCCATGACTCGTCCCGACCCTTCC |
| AstK-R2 | TCAGCTAATTAAGCTTGATCACATCCCGTTGCCCAGC |
| AstL-F | TCGAGCTCGGTACCCAAATGGATTACCCCGGTCTTCTG |
| AstL-R | CTACTACAGATCCCCTCAAGCAAGCTGCTTCTTTCGGACC |
| AstL-F2 | AAGGAGATATACATATACCCCGGTCTTCTG |
| AstL-R2 | GTGCGGCCGCAAGCTCTGCTTCTTCGGAC |
| AstL-F3 | AAGGAGATATACATATACCCCGGTCTTCTG |
| AstL-R3 | GTGCGGCCGCAAGCTCTGCTTCTTTCGGAC |
| InF-pAdeA_SpeI-F | TAGAGGATCTACTAGTCAAGAGCAGAATGTGAACG |
| InF-pAdeA_SpeI-R | AATCCATATGACTAGTGATACATGAGCTTCGGTG |
| InF-pPTRI_HindIII-F | TGATTACGCCAAGCTCCCATCATGGTGTTTTGATC |
| InF-pPTRI_HindIII-R | GCAGGCATGCAAGCTGTAAGATACATGAGCTTCGG |
| InF-linker-F1 | GCTCGCGAGCGCGTTCCACTGCATCATCAGTCTAG |
| InF-linker-F1 | AACGCGCTCGCGAGCAAGTACCATACAGTACCGCG |
| Infu_pTA_PamyB_F1 | GCTCGCGAGCGCGTTCCACTGCATCATCAGTCTAG |
| Infu_pTA_TamyB_R1 | AACGCGCTCGCGAGCAAGTACCATACAGTACCGCG |
| Infu_pTA_PamyB_F2 | TCGCGTGCGCGTTTACCCATCATGGTGTTTTGATC |
| Infu_pTA_TamyB_R2 | TAAACGCGCACGCGACATTAATCCGGATCCTTTCC |
| Infu-pBARI-PamyB-HindIII-Fw | TGATTACGCCAAGCTCCCATCATGGTGTTTTGATC |
| Infu-pBARI-TamyB-HindIII-Rv | GCAGGCATGCAAGCTGTAAGATACATGAGCTTCGG |
| Infu_pUSA_PamyB_F1 | GCTCGCGAGCGCGTTCGATATCATGGTGTTTTGATC |
| Infu_pUSA_TamyB_R1 | AACGCGCTCGCGAGCCTTTCCTATAATAGACTAGCGTG |
| Infu_pUSA_PamyB_F2 | TCGCGTGCGCGTTTACGATATCATGGTGTTTTGATC |
| Infu_pUSA_TamyB_R2 | TAAACGCGCACGCGACTTTCCTATAATAGACTAGCGTG |

Table S2. Plasmids constructed in this study and PCR/ligation conditions

| Plasmid | *Insert* | Vector | Primer1 | Primer2 | PCR template |
| --- | --- | --- | --- | --- | --- |
| pUSA-AstE | *AstE* | pUSA digested by *SmaI* | AstE-F | AstE-R | gDNA |
| pAdeA-AstA | *AstA* | pAdeA digested by *SpeI* | AstA-F | AstA-R | gDNA |
| pTAex3-AstL | *AstL* | pTAex3 digested by *SmaI* | AstL-F | AstL-R | gDNA |
| pTAex3-AstD | *AstD* | pTAex3 digested by *SmaI* | AstD-F | AstD-R | gDNA |
| pAdeA-AstA+AstG | *PamyB-AstA-TamyB* | pAdeA digested by *SpeI* | InF-pAdeA-SpeI-F | InF-linker-R1 | pAdeA-AstA |
| *PamyB-AstG-TamyB* | InF-linker-F1 | InF-pAdeA-SpeI-R | pTAex3-AstG |
| pTAex3-AstD+AstF | *PamyB-AstD-TamyB* | pTAex3 digested by *SmaI* | Infu_pTA_TamyB_F1 | InF-linker-R1 | pTAex3-AstD |
| *PamyB-AstF-TamyB* | InF-linker-F1 | Infu_pTA_TamyB_R1 | pTAex3-AstF |
| pTAex3-AstL+AstF | *PamyB-AstL-TamyB* | pTAex3 digested by *SmaI* | Infu_pTA_TamyB_F1 | InF-linker-R1 | pTAex3-AstL |
| *PamyB-AstF-TamyB* | InF-linker-F1 | Infu_pTA_TamyB_R1 | pTAex3-AstLL |
| pTAex3-AstH | *AstH* | pTAex3 digested by *SmaI* | AstH-F | AstH-R | gDNA |
| pTAex3-AstG | *AstG* | pTAex3 digested by *SmaI* | AstG-F | AstG-R | gDNA |
| pTAex3-AstF | *AstF* | pTAex3 digested by *SmaI* | AstF-F | AstF-R | gDNA |
| pTAex3-AstC | *AstC* | pTAex3 digested by *SmaI* | AstC-F | AstC-R | gDNA |
| pTAex3-AstJ | *AstJ* | pTAex3 digested by *SmaI* | AstJ-F | AstJ-R | gDNA |
| pPTRI-AstH | *AstH* | pPTRI digested by *HindIII* | AstH-F | AstH-R | pTAex3-AstH |
| pPTRI-AstH+AstF | *PamyB-AstH-TamyB* | *pPTRI digested by HindIII* | Infu_pTA_TamyB_F1 | Infu_pBARI_PamyB_HindIII_Rv | pTAex3-AstH |
| *PamyB-AstF-TamyB* | Infu_pBARI_PamyB_HindIII_Fw | Infu_pTA_TamyB_R1 | pTAex3-AstF |
| pPTRI-AstH+AstJ+AstC | *PamyB-AstH-TamyB* | pPTRI digested by *HindIII* | InF-pPTRI_HindIII-F | Infu_pUSA_TamyB_R1 | pTAex3-AstH |
| *PamyB-AstJ-TamyB* | Infu_pUSA_PamyB_F1 | Infu_pUSA_TamyB_R2 | pTAex3-AstJ |
| *PamyB-AstC-TamyB* | Infu_pUSA_PamyB_F2 | InF-pPTRI_HindIII-RFF | pTAex3-AstC |
| pBARI-AstD | *AstD* | pBARI digested by *SmaI* | AstD-F3 | AstD-R3 | pTAex3-AstD |
| pUNA-AstB | *AstB* | pUNA digested by *SmaI* | AstB-F | AstB-R | gDNA |
| pUNA-AstI | *AstI* | pUNA digested by *SmaI* | AstI-F | AstI-R | gDNA |
| pUNA-AstK | *AstK* | pUNA digested by *SmaI* | AstK-F | AstK-R | gDNA |
| pBARI-AstB | *AstB* | pBARI digested by *SmaI* | AstB-F2 | AstB-R2 | pUNA-AstB |
| pBARI-AstI | *AstI* | pBARI digested by *SmaI* | AstI-F2 | AstI-R2 | pUNA-AstI |
| pBARI-AstK | *AstK* | pBARI digested by *SmaI* | AstK-F2 | AstK-R2 | pUNA-AstK |
| pQTev-AstB | *AstB* | pQTev digested by *HindIII* and *BamHI* | AstB-F3 | AstB-R3 | pUNA-AstB |
| pQTev-AstI | *AstI* | pQTev digested by *HindIII* and *BamHI* | AstI-F3 | AstI-R3 | pUNA-AstI |
| pQTev-AstK | *AstK* | pQTev digested by *HindIII* and *BamHI* | AstK-F3 | AstK-R3 | pUNA-AstK |
| pET22-AstL | *AstL* | pET22 digested by *NdeI* and *HindIII* | AstL-F3 | AstL-R3 | pQTev-AstL |

| **Strain** | **Host strain** | **Plasmids used for transformation** |
| --- | --- | --- |
| *A. oryzae/astE* | *A. oryzae* NSAR1 | pUSA-AstE |
| *A. oryzae/astEA* | *A. oryzae* NSAR1 | pUSA-AstE, pAdeA-AstA |
| *A. oryzae/astEAG* | *A. oryzae* NSAR1 | pUSA-AstE, pAdeA-AstA+AstG |
| *A. oryzae/astEAGDF* | *A. oryzae/astEAG* | pTAex3-AstD+AstF |
| *A. oryzae/astEAGLF* | *A. oryzae/astEAG* | pTAex3-AstL+AstF |
| *A. oryzae/astEAGDFHJC* | *A. oryzae/astEAGDF* | pPTRI-AstH+AstJ+AstC |
| *A. oryzae/astEAGLFHJC* | *A. oryzae/astEAGLF* | pPTRI-AstH+AstJ+AstC |
| *A. oryzae/astEAGLFHJCD* | *A. oryzae/astEAGLFHJC* | pBARI-AstD |

Table S3. *A.oryzae* transformants constructed in this study

Table S4. NMR data for 10’,11’-dihydroxyfarnesyl-DHMP (**4’**)

1H NMR: 500 MHz, 13C NMR: 125 MHz (in CDCl3)

Table S5. NMR data for 6’-*O*-demethyl-dihydroaustalide K (**5**)

| position | 13 C  *σ*(ppm) | 1H | | | | |
| --- | --- | --- | --- | --- | --- | --- |
| *σ*(ppm) | Intensity | multiplicity | HMBC correlation | COSY correlation |
| 1 | 38.2 | 1.08 | 1H | td (*J* = 13.4, 3.7 Hz) | 13 | H-2 |
|  |  | 1.92 | 1H | dt (*J* = 13.3, 3.6 Hz) | 2, 3,5,10,13 | H-2 |
| 2 | 27.1 | 1.67 | 1H | m |  | H-1, H-3 |
|  |  | 1.56 | 1H | m |  | H-1, H-3 |
| 3 | 78.9 | 3.24 | 1H | dd (*J* = 11.8, 4.8 Hz) | 14, 15 | H-2 |
| 4 | 38.9 |  |  |  | 14,15 |  |
| 5 | 54.3 | 0.93 | 1H | d (*J* = 10.9 Hz) | 3, 4, 6, 7, 10, 13, 14, 15 | H-6 |
| 6 | 18.0 | 1.68 | 1H | m | 8, 10 | H-5, H-7 |
|  |  | 1.57 | 1H | m | 5, 8 | H-5, H-7 |
| 7 | 40.5 | 2.25 | 1H | m | 6, 8, 9, 12 | H-6 |
|  |  | 1.63 | 1H | m | 5, 6, 8 | H-6 |
| 8 | 76.8 |  |  |  | 12 |  |
| 9 | 47.9 | 1.40 | 1H | d (*J* =8.3 Hz) | 1, 5, 8, 10, 11, 13 | H-11 |
| 10 | 38.2 |  |  |  | 9，13 |  |
| 11 | 17.1 | 2.70 | 1H | dd (*J*=18.4, 8.2 Hz) | 9, 3', 4', 9' | H-9 |
|  |  | 2.83 | 1H | d (*J*=18.5 Hz) | 9, 3', 4' | H-9 |
| 12 | 27.3 | 1.16 | 3H | s | 7, 8, 9 |  |
| 13 | 14.2 | 0.62 | 3H | s | 1, 9, 10 |  |
| 14 | 15.8 | 0.78 | 3H | s | 3, 4, 5, 15 |  |
| 15 | 28.6 | 1.03 | 3H | s | 3, 4, 5, 14 |  |
| 1' | 70.0 | 5.16 | 2H | s | 2', 7', 8' |  |
| 2' | 142.8 |  |  |  |  |  |
| 3' | 109.6 |  |  |  |  |  |
| 4' | 159.9 |  |  |  |  |  |
| 5' | 111.6 |  |  |  |  |  |
| 6' | 152.2 |  |  |  |  |  |
| 7' | 101.7 |  |  |  |  |  |
| 8' | 173.4 |  |  |  |  |  |
| 9' | 11.0 | 2.00 | 3H | s | 11, 2', 3', 4' |  |

1H NMR: 500 MHz, 13C NMR: 125 MHz (in CDCl3)

Table S6. NMR data for austalide V (**6**)

| position | 13 C  *σ*(ppm) | 1H | | |
| --- | --- | --- | --- | --- |
| *σ*(ppm) | intensity | multiplicity |
| 1 | 38.4 | 1.51 | 1H | m |
|  |  | 2.13 | 1H | ddd (*J* = 13.5, 7.0, 3.7 Hz) |
| 2 | 34.2 | 2.27 | 1H | m |
|  |  | 2.54 | 1H | m |
| 3 | 216.9 |  |  |  |
| 4 | 47.4 |  |  |  |
| 5 | 54.4 | 1.51 | 1H | m |
| 6 | 19.2 | 1.51 | 1H | m |
|  |  | 1.79 | 1H | td (*J* = 13.0, 3.1 Hz) |
| 7 | 39.9 | 1.67 | 1H | dd (*J* = 13.7, 3.8 Hz) |
|  |  | 2.27 | 1H | m |
| 8 | 76.6 |  |  |  |
| 9 | 47.0 | 1.51 | 1H | m |
| 10 | 37.8 |  |  |  |
| 11 | 17.5 | 2.78 | 1H | dd (*J* = 18.9, 7.3 Hz) |
|  |  | 2.86 | 1H | d (*J* = 18.3 Hz) |
| 12 | 27.2 | 1.19 | 3H | m |
| 13 | 14.1 | 0.62 | 3H | d (*J* = 2.2 Hz) |
| 14 | 21.8 | 1.03 | 3H | d (*J* = 2.4 Hz) |
| 15 | 27.0 | 1.13 | 3H | d (*J* = 2.2 Hz) |
| 1' | 70.0 | 5.18 | 2H | d (*J* = 4.5 Hz) |
| 2' | 143.0 |  |  |  |
| 3' | 109.2 |  |  |  |
| 4' | 159.7 |  |  |  |
| 5' | 111.7 |  |  |  |
| 6' | 152.6 |  |  |  |
| 7' | 101.9 |  |  |  |
| 8' | 173.4 |  |  |  |
| 9' | 10.9 | 2.02 | 3H | m |

1H NMR: 500 MHz, 13C NMR: 125 MHz (in CDCl3)

Table S7. NMR data for 2*R*-hydroxyaustalide V（**6’**）

| position | 13 C  ***σ***(ppm) | 1H | | | | |
| --- | --- | --- | --- | --- | --- | --- |
| ***σ***(ppm) | intensity | multiplicity | HMBC correlation | COSY correlation |
| 1 | 48.5 | 1.22 | 1Hα | dd (*J* = 12.9, 12.9 Hz) | 12 | H-2, |
|  |  | 2.63 | 1Hβ | dd (*J* = 12.9, 6.6 Hz) | 2,3,5,10,12 | H-2 |
| 2 | 68.9 | 4.53 | 1H | dd (*J* = 12.9, 6.6 Hz) | 1 | H-1 |
| 3 | 216.0 |  |  |  | 1, 14, 15 | H-2 |
| 4 | 47.5 |  |  |  | 13, 14, 15 |  |
| 5 | 56.6 | 1.36 | 1H | dd (*J* =12.0, 1.0 Hz) | 6,7,10,14 | H-6 |
| 6 | 18.9 | 1.57 | 1Hβ | Overlapped in H2O peak | 9.12.15 | H-5, H-7 |
|  |  | 1.88 | 1Hα | dddd (*J* =12.7, 12.7, 12.7, 3.4 Hz) |  | H-5, H-7 |
| 7 | 40.1 | 2.31 | 1Hα | dt (*J* =14.2, 3.0 Hz) |  | H-6 |
|  |  | 1.66 | 1Hβ | td (*J* =13.7, 4.6 Hz) | 6 | H-6 |
| 8 | 76.6 |  |  |  | 9, 12 |  |
| 9 | 47.2 | 1.48 | 1H | d (*J* =8.2 Hz) | 1, 6, 7, 10, 11, 13 | H-11 |
| 10 | 38.8 |  |  |  | 9, 13 |  |
| 11 | 17.4 | 2.92 | 1Hα | d (*J* =18.6 Hz) | 5', 8 | H-9 |
|  |  | 2.77 | 1Hβ | dd (*J* =18.5, 8.1Hz) | 5', 10 | H-9 |
| 12 | 27.3 | 1.19 | 3H | s | 7, 8, 9 |  |
| 13 | 14.8 | 0.97 | 3H | s | 1, 4, 5, 9, 10 |  |
| 14 | 21.9 | 1.11 | 3H | s | 3, 4, 15 |  |
| 15 | 25.2 | 1.20 | 3H | s | 3, 4, 5, 10, 14 |  |
| 1' | 70.0 | 5.17 | 2H | s | 2', 7', 8' |  |
| 2' | 143.1 |  |  |  |  |  |
| 3' | 109.1 |  |  |  |  |  |
| 4' | 159.4 |  |  |  |  |  |
| 5' | 111.7 |  |  |  |  |  |
| 6' | 152.6 |  |  |  |  |  |
| 7' | 102.1 |  |  |  |  |  |
| 8' | 173.3 |  |  |  |  |  |
| 9' | 10.9 | 2.02 | 3H | s | 2', 3’, 4' |  |

1H NMR: 500 MHz, 13C NMR: 125 MHz (in CDCl3)

Table S8. NMR data for dihydroaustalide K (**5’**)

| position | 13 C  ***σ***(ppm) | 1H | | |
| --- | --- | --- | --- | --- |
| ***σ***(ppm) | intensity | multiplicity |
| 1 | 38.3 | 1.88 | 1H | dt (*J* = 13.3, 3.9 Hz) |
|  |  | 1.08 | 1H | td (*J* = 13.3, 3.9 Hz) |
| 2 | 27.2 | 1.67  1.56 | 1H  1H | m  m |
| 3 | 78.9 | 3.24 | 1H | dd (*J* = 11.7, 4.5 Hz) |
| 4 | 38.9 |  |  |  |
| 5 | 54.3 | 0.92 | 1H | dt (*J* = 11.4, 1.8 Hz) |
| 6 | 18.1 | 1.59 | 1H | m |
|  |  | 1.66 | 1H | m |
| 7 | 40.5 | 2.25 | 1H | m |
|  |  | 1.63 | 1H | m |
| 8 | 76.6 |  |  |  |
| 9 | 48.1 | 1.39 | 1H | d (*J* = 8.2 Hz) |
| 10 | 38.2 |  |  |  |
| 11 | 18.0 | 2.92 | 1H | d (*J* = 18.5 Hz) |
|  |  | 2.73 | 1H | dd (*J* = 18.5, 8.2 Hz) |
| 12 | 27.4 | 1.15 | 3H | s |
| 13 | 14.4 | 0.61 | 3H | s |
| 14 | 15.8 | 0.77 | 3H | s |
| 15 | 28.6 | 1.03 | 3H | s |
| 16 | 62.0 | 4.09 | 3H |  |
| 1' | 68.4 | 5.11 | 2H | s |
| 2' | 145.5 |  |  |  |
| 3' | 114.5 |  |  |  |
| 4' | 159.1 |  |  |  |
| 5' | 115.9 |  |  |  |
| 6' | 155.5 |  |  |  |
| 7' | 107.3 |  |  |  |
| 8' | 169.7 |  |  |  |
| 9' | 10.8 | 2.03 | 3H | s |

1H NMR: 500 MHz, 13C NMR: 125 MHz (in CDCl3)

Table S9. NMR data for austalide K (**7**)

| position | 13 C  *σ*(ppm) | 1H | | |
| --- | --- | --- | --- | --- |
| *σ*(ppm) | intensity | multiplicity |
| 1 | 38.5 | 1.51 | 1H | m |
|  |  | 2.13 | 1H | ddd (*J* = 13.5, 7.0, 3.7 Hz) |
| 2 | 34.2 | 2.42 | 1H | dd (*J* = 6.4, 3.7 Hz) |
|  |  | 2.55 | 1H | m |
| 3 | 216.8 |  |  |  |
| 4 | 47.4 |  |  |  |
| 5 | 54.4 | 1.49 | 1H | m |
| 6 | 19.2 | 1.52 | 1H | m |
|  |  | 1.79 | 1H | td (*J* = 13.0, 3.1 Hz) |
| 7 | 39.9 | 1.66 | 1H | dd (*J* = 13.7, 3.8 Hz) |
|  |  | 2.28 | 1H | m |
| 8 | 76.3 |  |  |  |
| 9 | 47.2 | 1.50 | 1H | m |
| 10 | 37.7 |  |  |  |
| 11 | 18.4 | 2.77 | 1H | dd (*J* = 18.9, 7.3 Hz) |
|  |  | 2.94 | 1H | d (*J* = 18.3 Hz) |
| 12 | 27.2 | 1.19 | 3H | s |
| 13 | 14.3 | 0.73 | 3H | s |
| 14 | 21.8 | 1.03 | 3H | s |
| 15 | 26.8 | 1.12 | 3H | s |
| 16 | 62.1 | 4.10 | 3H | s |
| 1' | 68.4 | 5.12 | 2H | s |
| 2' | 145.7 |  |  |  |
| 3' | 114.6 |  |  |  |
| 4' | 158.8 |  |  |  |
| 5' | 115.4 |  |  |  |
| 6' | 155.5 |  |  |  |
| 7' | 107.5 |  |  |  |
| 8' | 169.6 |  |  |  |
| 9' | 10.8 | 2.04 | 3H | s |

1H NMR: 500 MHz, 13C NMR: 125 MHz (in CDCl3)

Table S10. NMR data for 13-deacetoxyaustalide I (**8**)

| position | 13 C  *σ*(ppm) | 1H | |
| --- | --- | --- | --- |
| *δ*(ppm) | intensity |
| 1 | 37.5 | 1.73-1.63(m) | 1H |
|  |  | 2.01-1.83(m) | 1H |
| 2 | 32.0 | 2.60 (ddd, *J* = 15.7, 8.2, 2.5 Hz)  2.68(ddd, 14.4, 10.8, 3.2) | 1H  1H |
| 3 | 175.2 |  |  |
| 4 | 85.9 |  |  |
| 5 | 53.8 | 2.01-1.83 (m) | 1H |
| 6 | 22.3 | 1.54-1.52(m)  2.02-1.84(m) | 1H  1H |
| 7 | 39.4 | 1.73-1.63 (m) | 1H |
|  |  | 2.24 (dt, *J* = 14.2, 3.3 Hz) | 1H |
| 8 | 76.1 |  |  |
| 9 | 47.5 | 1.56(d, *J* = 11.3 Hz) | 1H |
| 10 | 40.6 |  |  |
| 11 | 18.8 | 2.83 (dd, *J* = 18.7, 8.1 Hz)  eq: 2.95(d, 18.6) | 1H  1H |
| 12 | 27.2 | 1.20 (s) | 3H |
| 13 | 16.8 | 0.82 (s) | 3H |
| 14 | 26.0 | 1.41 (s) | 3H |
| 15 | 32.6 | 1.51 (s) | 3H |
| 16 | 62.2 | 4.12 (s) | 3H |
| 1’ | 68.4 | 5.12 (s) | 2H |
| 2’ | 145.8 |  |  |
| 3’ | 114.5 |  |  |
| 4’ | 158.5 |  |  |
| 5’ | 115.2 |  |  |
| 6’ | 155.5 |  |  |
| 7’ | 107.6 |  |  |
| 8’ | 168.5 |  |  |
| 9’ | 10.8 | 2.04 (s) | 3H |

1H NMR: 500 MHz, 13C NMR: 125 MHz (in CDCl3)

Table S11. NMR data for 13-*O*-deacetylaustalide I (**9**)

| position | 1H | |
| --- | --- | --- |
| *δ*(ppm) | intensity |
| 1 | 1.60 (m) | 1H |
|  | 2.05 (m) | 1H |
| 2 | 2.82 (dd, *J* = 16.5, 8.3 Hz)  2.70(dd, 16.0, 11.8) | 1H  1H |
| 3 |  |  |
| 4 |  |  |
| 5 | 1.67 (dd, *J* = 1.8 Hz) | 1H |
| 6 | 4.41(brs) | 1H |
| 7 | 1.97 (dd, *J* = 15.7, 3.8 Hz) | 1H |
|  | 2.55 (dd, *J* = 15.7, 2.7 Hz) | 1H |
| 8  9 | 1.62 (d, 8.1) | 1H |
| 10 |  |  |
| 11 | 2.88 (dd, *J* = 18.7, 8.1 Hz)  3.06 (d, 18.6) | 1H  1H |
| 12 | 1.26 (s) | 3H |
| 13 | 1.04 (s) | 3H |
| 14 | 1.58 (s) | 3H |
| 15 | 1.76 (s) | 3H |
| 16 | 4.15(s) | 3H |
| 1’ | 5.14 (s) | 2H |
| 2’ |  |  |
| 3’ |  |  |
| 4’ |  |  |
| 5’ |  |  |
| 6’ |  |  |
| 7’ |  |  |
| 8’ |  |  |
| 9’ | 2.06 (s) | 3H |

1H NMR: 500 MHz, 13C NMR: 125 MHz (in CDCl3)

Table 12. NMR data for austalide T (**10**)

| position | 13 C  *σ*(ppm) | 1H | |
| --- | --- | --- | --- |
| *δ*(ppm) | intensity |
| 1 | 32.2 | 2.03 (m) | 1H |
|  |  | 1.94 (m) | 1H |
| 2 | 31.1 | 2.82 (m)  1.63 (m) | 1H  1H |
| 3 | 172.0 |  |  |
| 4 | 85.5 |  |  |
| 5 | 87.6 |  |  |
| 6 | 70.1 | 4.06 (m) | 1H |
| 7 | 42.8 | 1.97 (dd, *J* = 15.7, 3.8 Hz) | 1H |
|  |  | 2.55 (dd, *J* = 15.7, 2.7 Hz) | 1H |
| 8 | 78.0 |  |  |
| 9 | 37.1 | 2.42 (d, *J* = 8.2 Hz) | 1H |
| 10 | 40.4 |  |  |
| 11 | 18.9 | 2.88 (dd, *J* = 18.7, 8.1 Hz)  3.06 (d, 18.6) | 1H  H |
| 12 | 27.9 | 1.29 (s) | 3H |
| 13 | 19.1 | 0.96 (s) | 3H |
| 14 | 29.7 | 1.47 (s) | 3H |
| 15 | 26.2 | 1.63 (s) | 3H |
| 16 | 62.2 | 4.03 (s) | 3H |
| 1’ | 69.2 | 5.14 (s) | 2H |
| 2’ | 146.9 |  |  |
| 3’ | 115.6 |  |  |
| 4’ | 158.8 |  |  |
| 5’ | 117.6 |  |  |
| 6’ | 156.1 |  |  |
| 7’ | 108.6 |  |  |
| 8’ | 170.1 |  |  |
| 9’ | 10.8 | 2.07 (s) | 3H |

1H NMR: 900 MHz, 13C NMR: 225 MHz (in acetonitrile-D3)

Table S13. NMR data for austalide B (**11**)

| position | 13 C  *δ*(ppm) | 1H | |
| --- | --- | --- | --- |
| *δ*(ppm) | intensity |
| 1 | 32.2 | 2.03 (m) | 1H |
|  |  | 1.94 (m) | 1H |
| 2 | 31.1 | 2.82 (m)  1.63 (m) | 1H  1H |
| 3 | 172.0 |  |  |
| 4 | 85.5 |  |  |
| 5 | 87.6 |  |  |
| 6 | 70.1 | 4.06 (brs) | 1H |
| 7 | 42.8 | 1.97 (dd, *J* = 15.7, 3.8 Hz) | 1H |
|  |  | 2.55 (dd, *J* = 15.7, 2.7 Hz) | 1H |
| 8  9 | 78.0  37.1 | 2.42 (d, 8.2) | 1H |
| 10 | 40.4 |  |  |
| 11 | 18.9 | 2.88 (dd, *J* = 18.7, 8.1 Hz)  3.06 (d, 18.6) | 1H  1H |
| 12 | 27.9 | 1.29 (s) | 3H |
| 13 | 19.1 | 0.96 (s) | 3H |
| 14 | 29.7 | 1.47 (s) | 3H |
| 15 | 26.2 | 1.63 (s) | 3H |
| 16 | 62.2 | 4.03 (s) | 3H |
| 17 | 48.9 | 3.41 (s) | 3H |
| 1’ | 69.2 | 5.14 (s) | 2H |
| 2’ | 146.9 |  |  |
| 3’ | 115.6 |  |  |
| 4’ | 158.8 |  |  |
| 5’ | 117.6 |  |  |
| 6’ | 156.1 |  |  |
| 7’ | 108.6 |  |  |
| 8’ | 170.1 |  |  |
| 9’ | 10.8 | 2.07 (s) | 3H |

1H NMR: 500 MHz, 13C NMR: 125 MHz (in CDCl3)

Table S14. NMR data for austalide F (**12**)

| position | 13 C  *δ*(ppm) | 1H |  |
| --- | --- | --- | --- |
| *δ*(ppm) | intensity |
| 1 | 69.6 | 3.76 (dd, *J* = 10.9 Hz) | 1H |
| 2 | 19.2 | 2.06-2.10 (m) | 2H |
| 3 | 118.4 |  |  |
| 4 | 78.2 |  |  |
| 5 | 85.8 |  | 1H |
| 6 | 68.1 | 4.16 (m) | 1H |
| 7 | 43.1 | 2.21-2.41 (m) | 2H |
| 8  9 | 78.2  43.1 | 2.51 (t, J=9.2 Hz) | 1H |
| 10 | 41.1 |  |  |
| 11 | 19.2 | 2.91 (t, *J* = 9.2 Hz)  2.98 (t, J=14.5 Hz) | 1H  1H |
| 12 | 29.0 | 1.24 (s) | 3H |
| 13 | 18.7 | 1.00 (s) | 3H |
| 14 | 26.4 | 1.51 (s) | 3H |
| 15 | 27.1 | 1.66 (s) | 3H |
| 16 | 62.2 | 4.12 (s) | 3H |
| 17 | 49.2 | 3.44(s) | 3H |
| 1’ | 68.3 | 5.11 (s) | 2H |
| 2’ | 145.9 |  |  |
| 3’ | 114.4 |  |  |
| 4’ | 155.5 |  |  |
| 5’ | 116.5 |  |  |
| 6’ | 157.1 |  |  |
| 7’ | 108.5 |  |  |
| 8’ | 169.2 |  |  |
| 9’ | 10.7 | 2.01 (s) | 1H |

1H NMR: 500 MHz, 13C NMR: 125 MHz (in CDCl3)

**
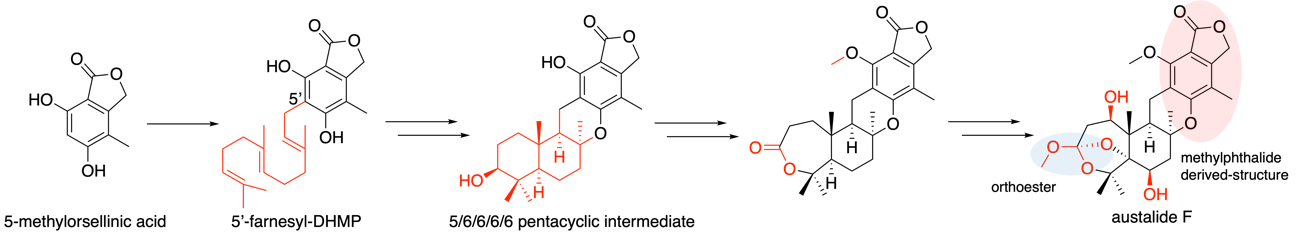
**

**Figure S1.** The representative biosynthetic scheme of austalides

**Figure S2.** The orthoester formation by NvfE (A) and HygX (B)

**
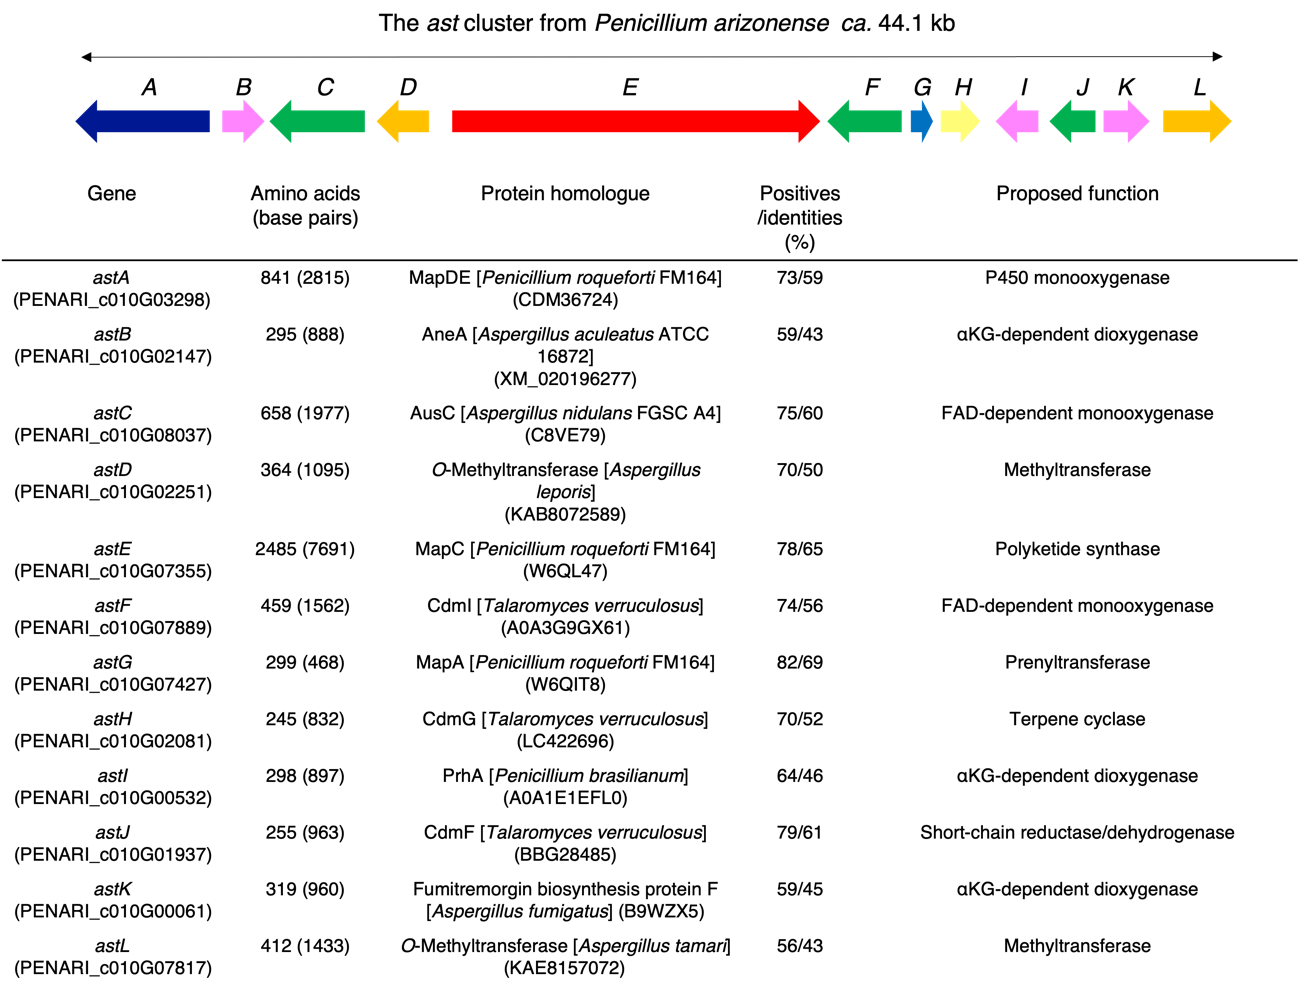
**

**Figure S3.** Schematic representation and annotation of *astA-L*.

**
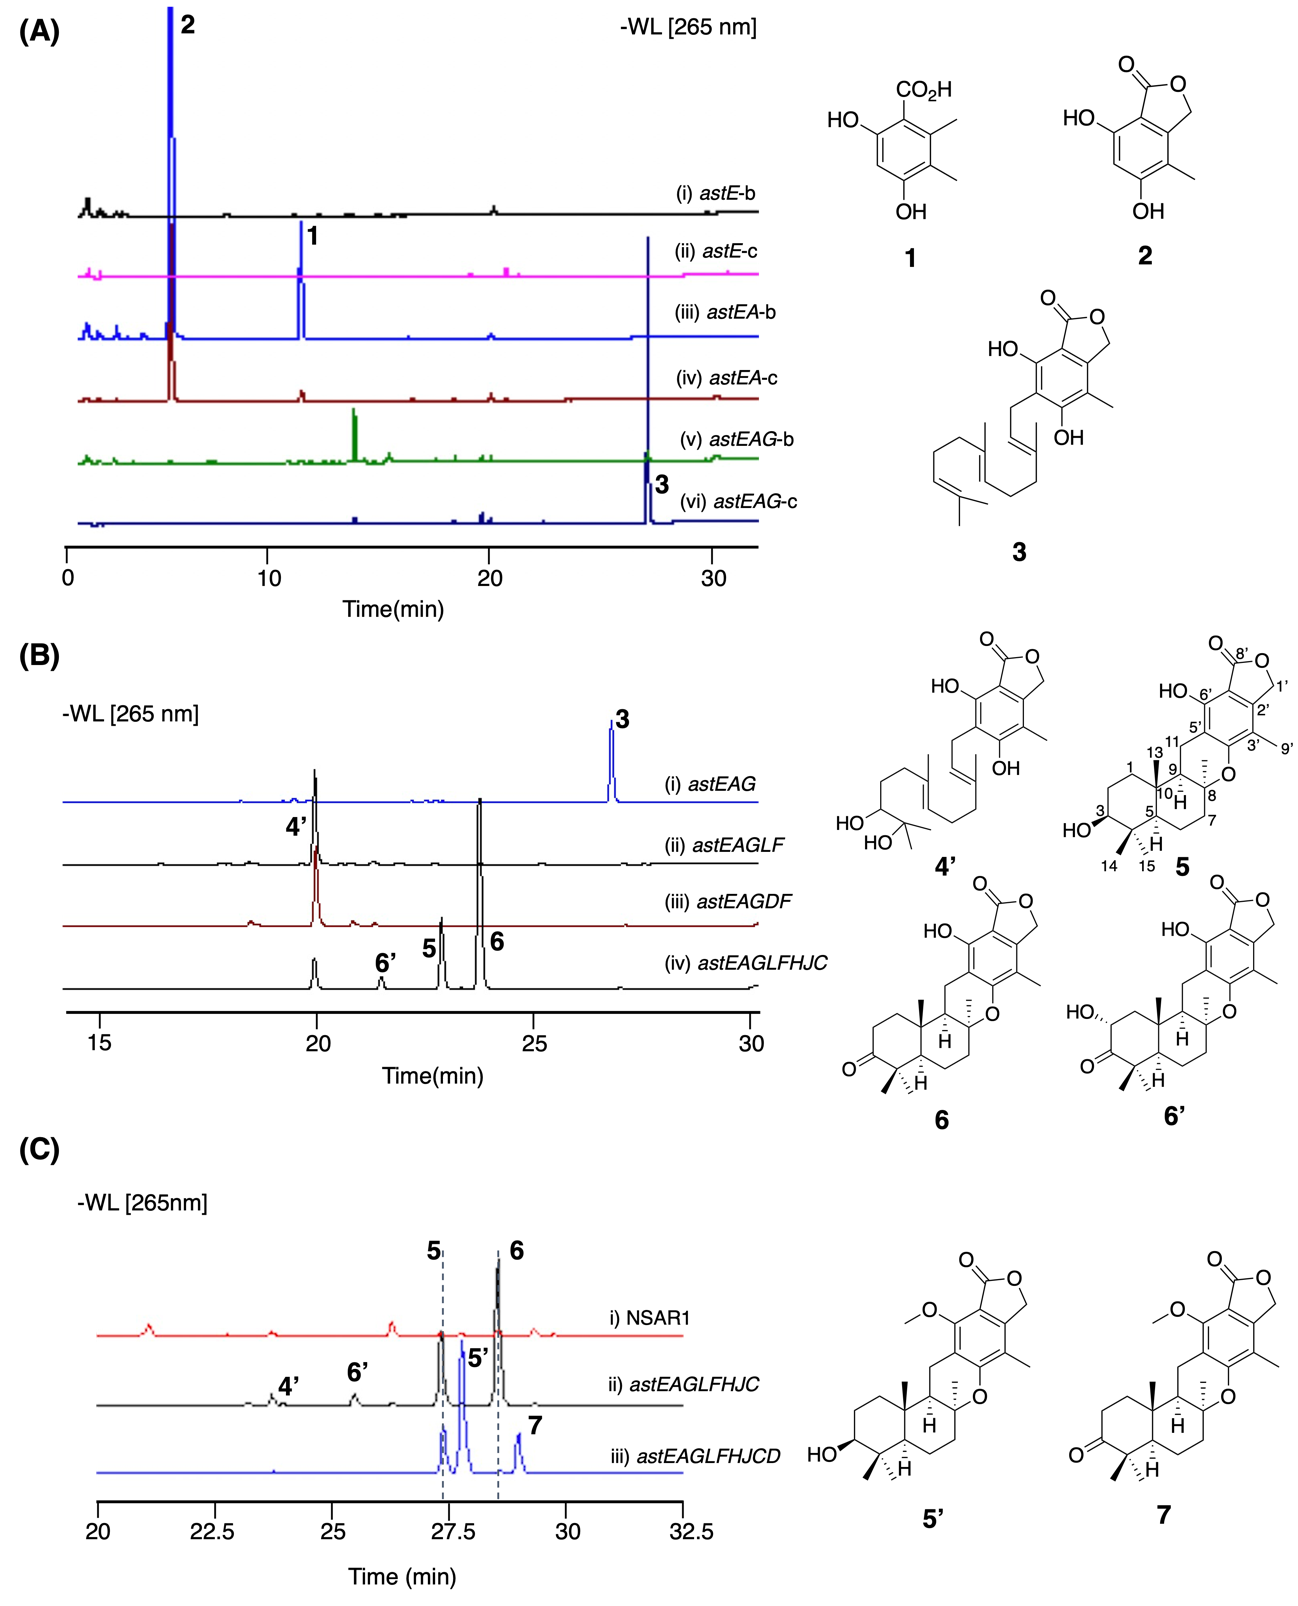
**

**Figure S4.** HPLC analysis of the extract of *A. oryzae* transformants (A-C). (A) The metabolites from the *A.oryzae* transformants harbouring i) *astE* (broth extract), ii) *astE* (cell extract), iii) *astEA* (broth extract), iv) *astEA* (cell extract), v) *astEAG* (broth extract), and vi) *astEAG* (cell extract). (B) The cell extracts from the *A.oryzae* transformants harbouring i) *astEAG*, ii) *astEAGLF*, iii) *astEAGDF*, and, iv) *astEAGLFJC.* (C) The cell extracts from the *A.oryzae* transformants harbouring i) no vector, ii) *astEAGLFHJC*, and iii) *astEAGLFHJCD*. The chromatograms were monitored at 265 nm. For (C), COSMOSIL(R) 5C18-AR-ⅡPacked Column 4.6 mm I.D.x250 mm (nacalai tesque) was utilized.

**
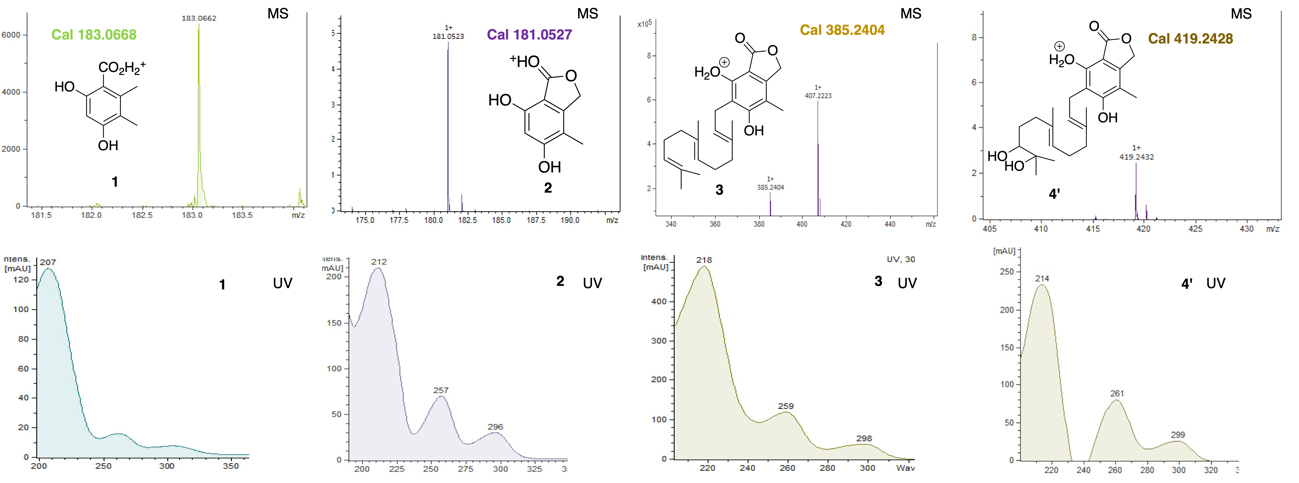
**

**Figure S5.** The MS and UV spectra of **1-4**.

**
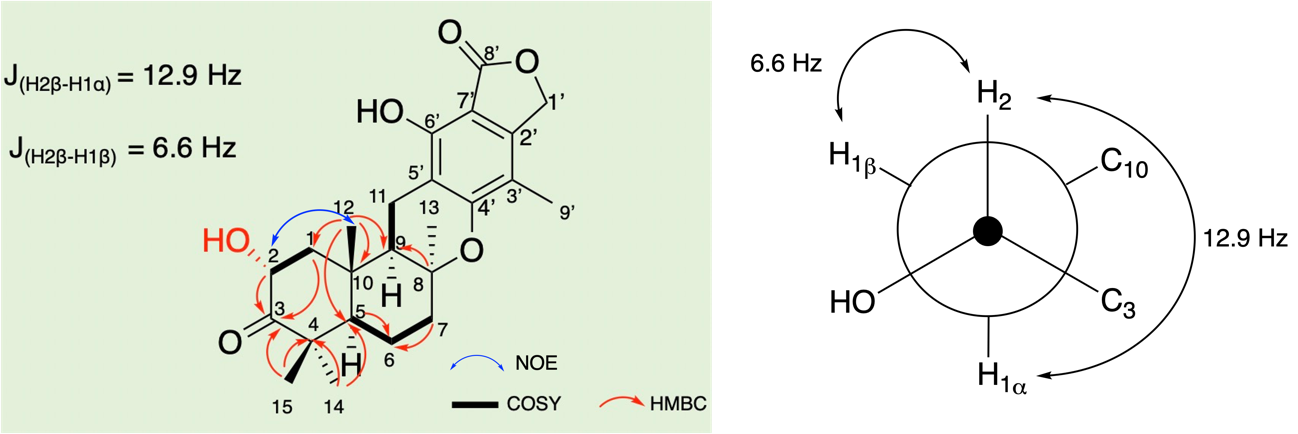
**

**Figure S6.** The COSY & HMBC correlation, NOE, and the key J values for structural elucidation of **6’.**

**
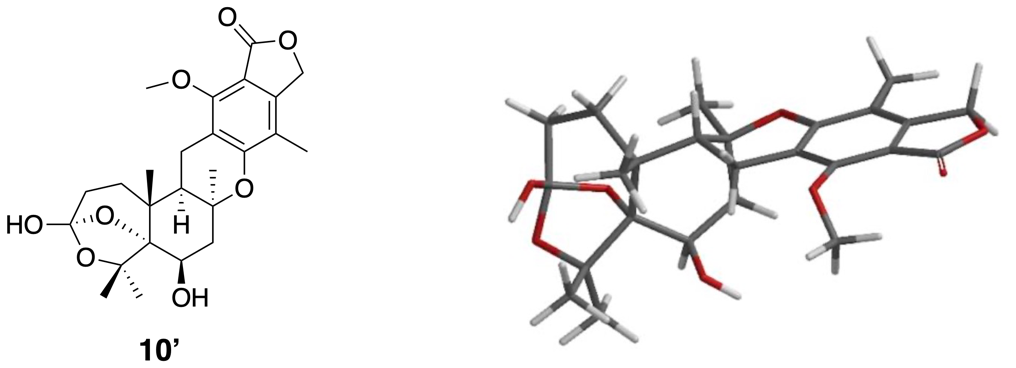
**

**Figure S7.** The 3D structure of 10’ calculated by Chem3D.

**Figure S8.** The comparison of mycophenolic acid [15-17] and austalide biosynthesis.

**
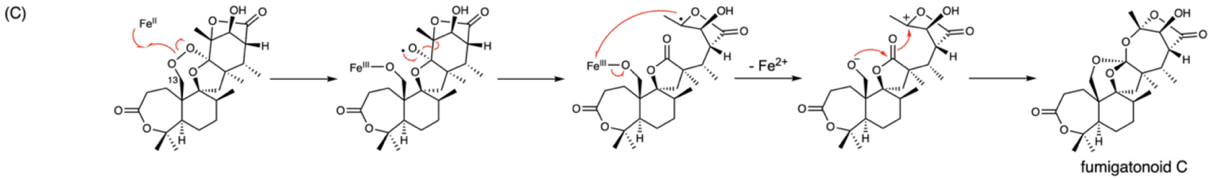
**

**Figure S9.** The comparison of the AstB reaction (A), AusE reaction [18] (B), and NvfE reaction [19] (C)

**Figure S10**. 1H NMR spectrum of 10’,11’-dihydroxyfarnesyl-DHMP (**4’**)

**Figure S11**. 13C NMR spectrum of 10’,11’-dihydroxyfarnesyl-DHMP (**4’**)

**Figure S12**. 1H-1H COSY spectrum of 10’,11’-dihydroxyfarnesyl-DHMP (**4’**)

**Figure S13**. HMQC spectrum of 10’,11’-dihydroxyfarnesyl-DHMP (**4’**)

**Figure S14**. HMBC spectrum of 10’,11’-dihydroxyfarnesyl-DHMP (**4’**)


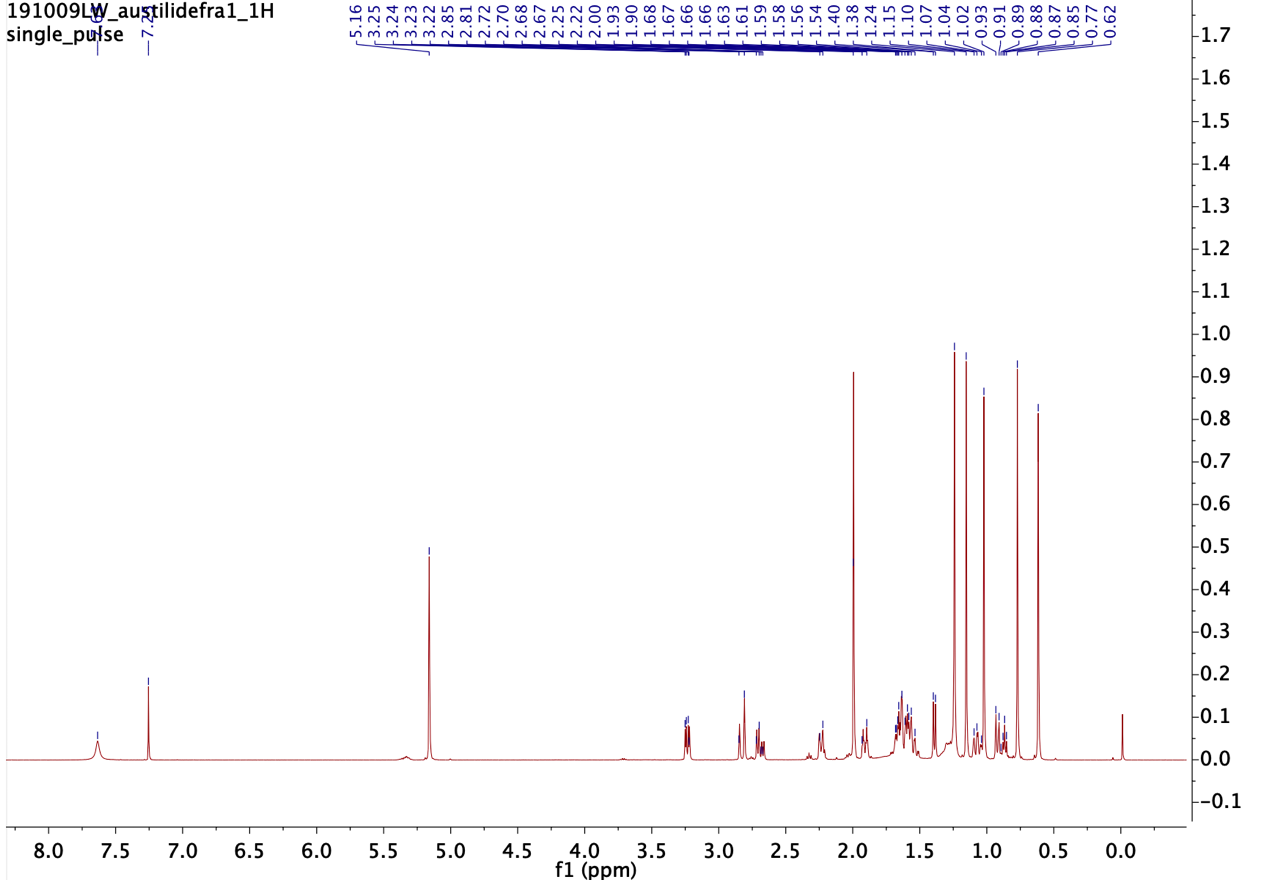


**Figure S15**. 1H NMR spectrum of 6’-*O*-demethyl-dihydroaustalide K (**5**)

**
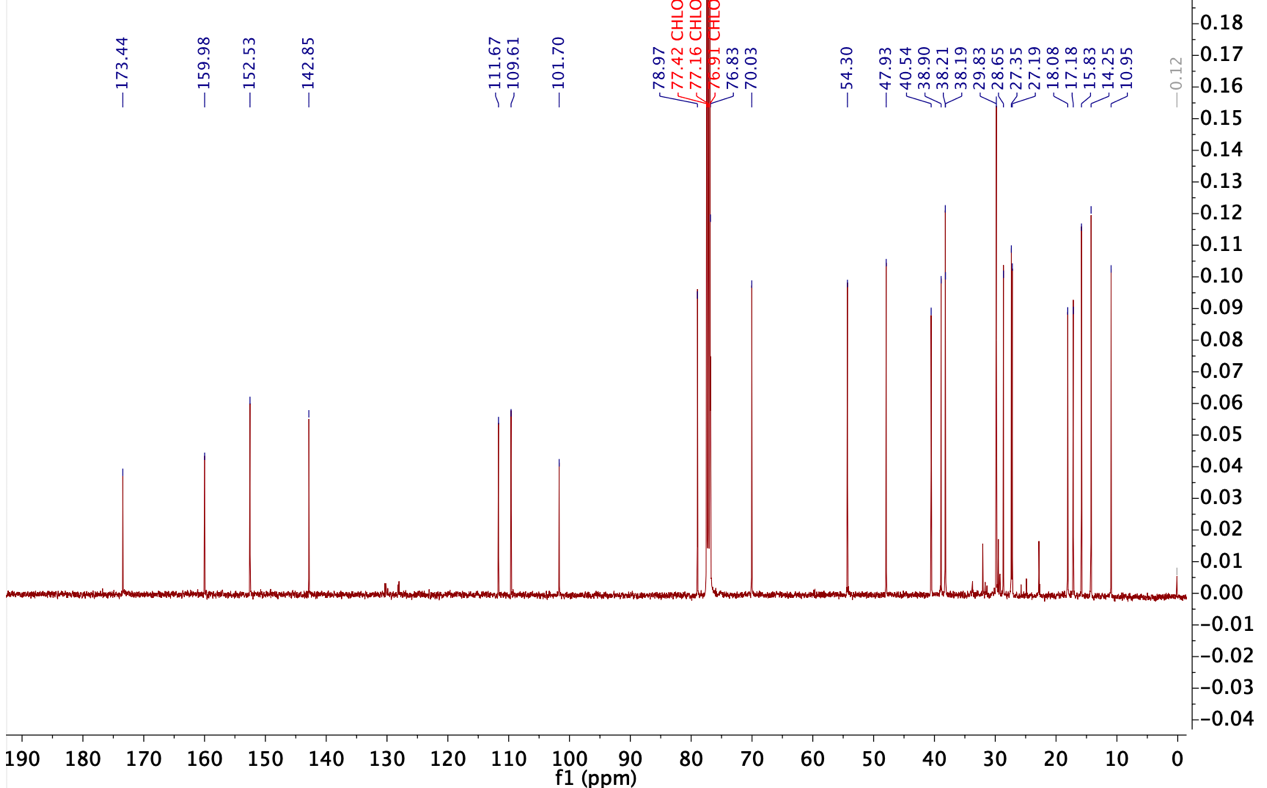
**

**Figure S16**. 13C NMR spectrum of 6’-*O*-demethyl-dihydroaustalide K (**5**)

**
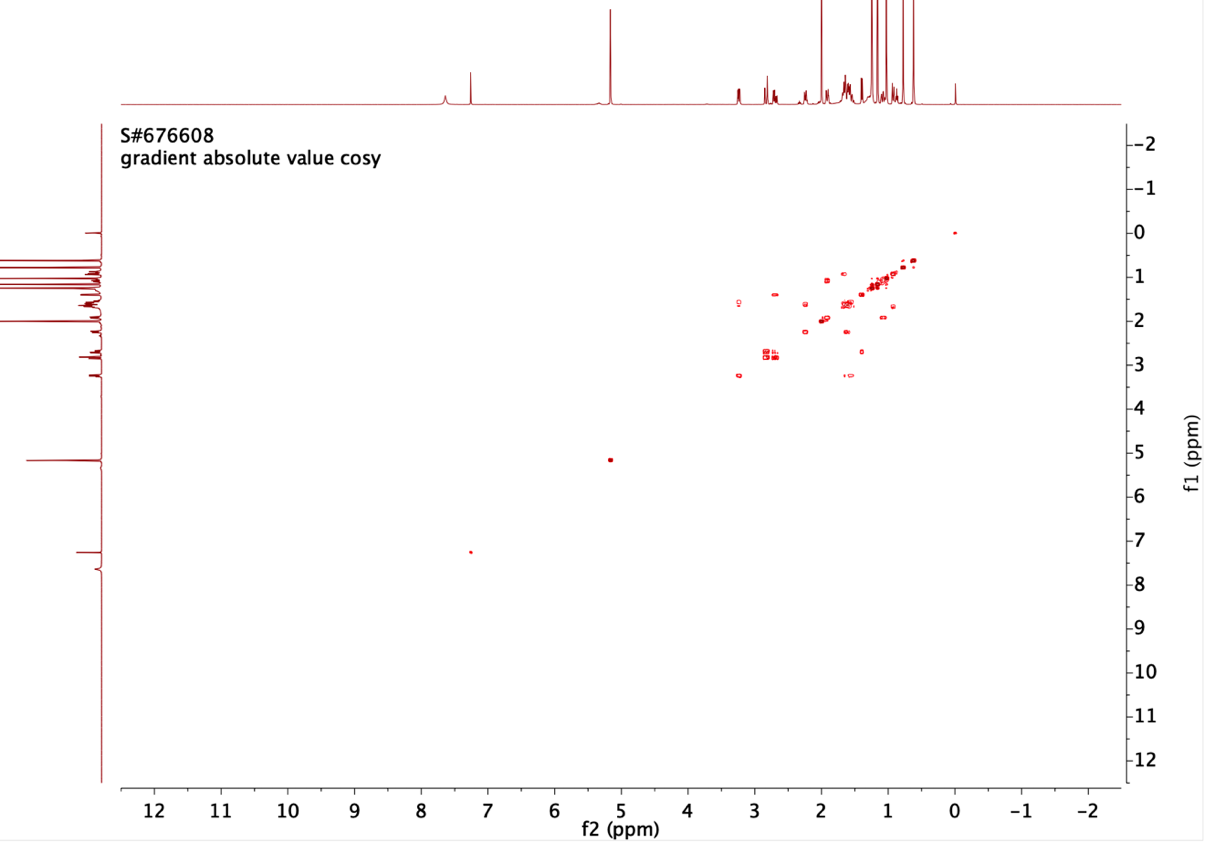
**

**Figure S17**. 1H-1H COSY spectrum of 6’-*O*-demethyl-dihydroaustalide K (**5**)

**
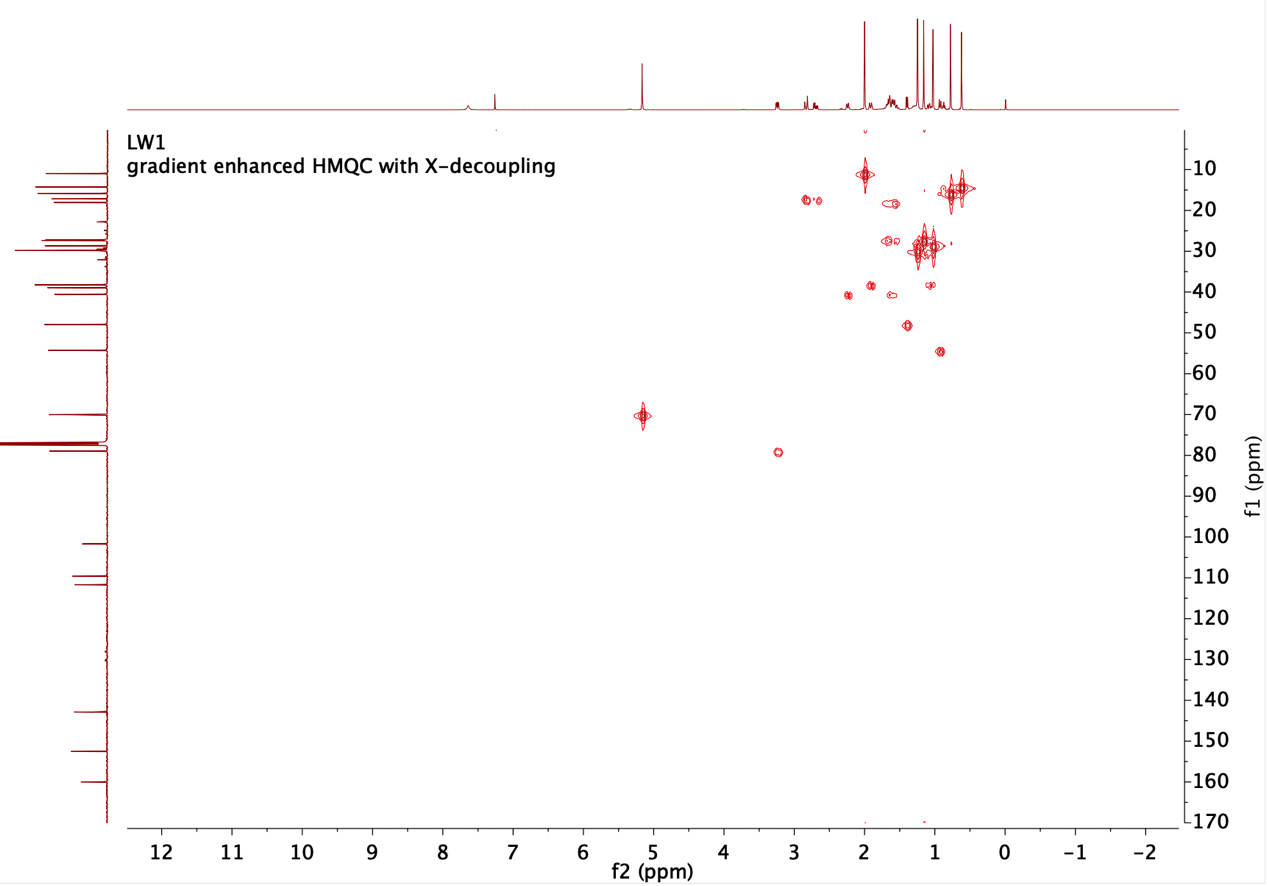
**

**Figure S18**. HMQC spectrum of 6’-*O*-demethyl-dihydroaustalide K (**5**)

**
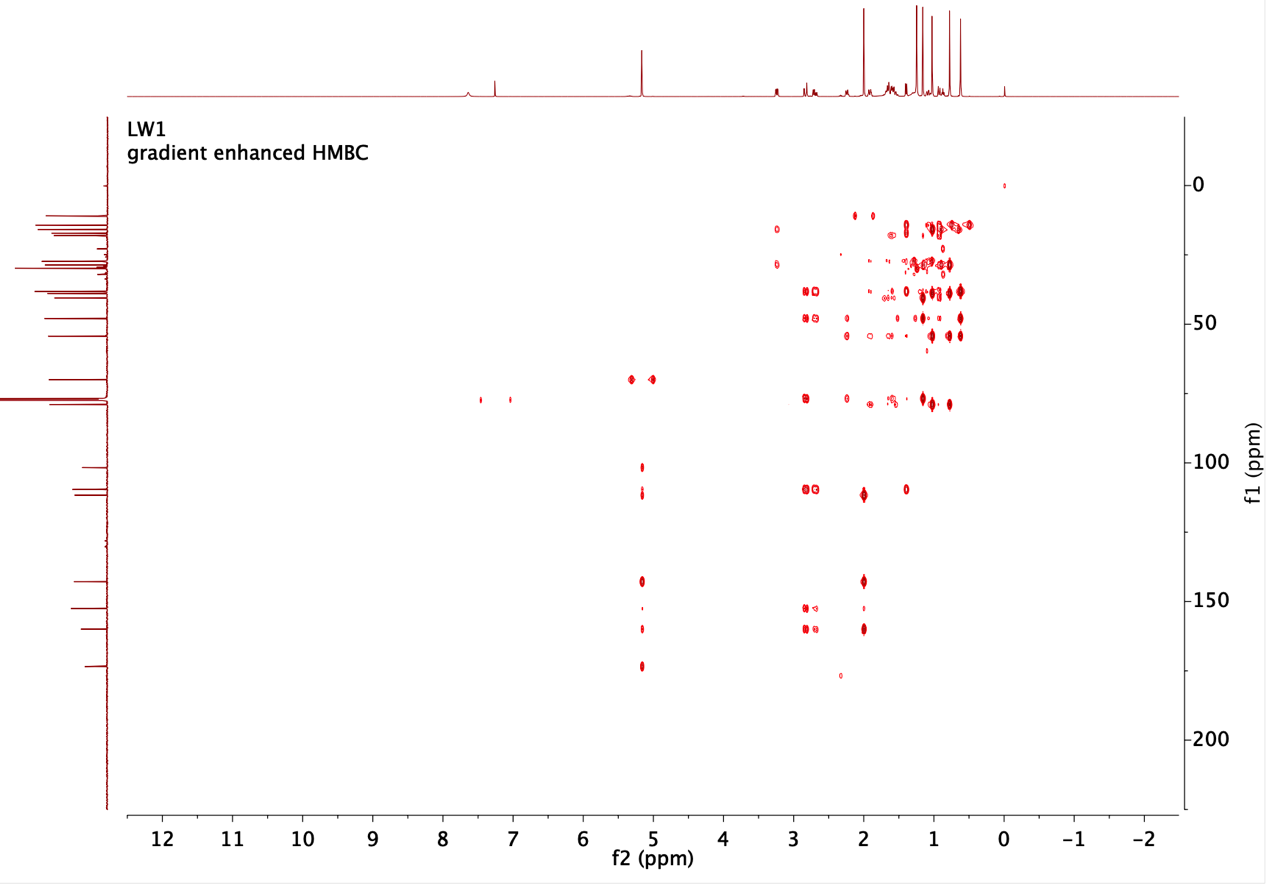
**

**Figure S19**. HMBC spectrum of 6’-*O*-demethyl-dihydroaustalide K (**5**)

**
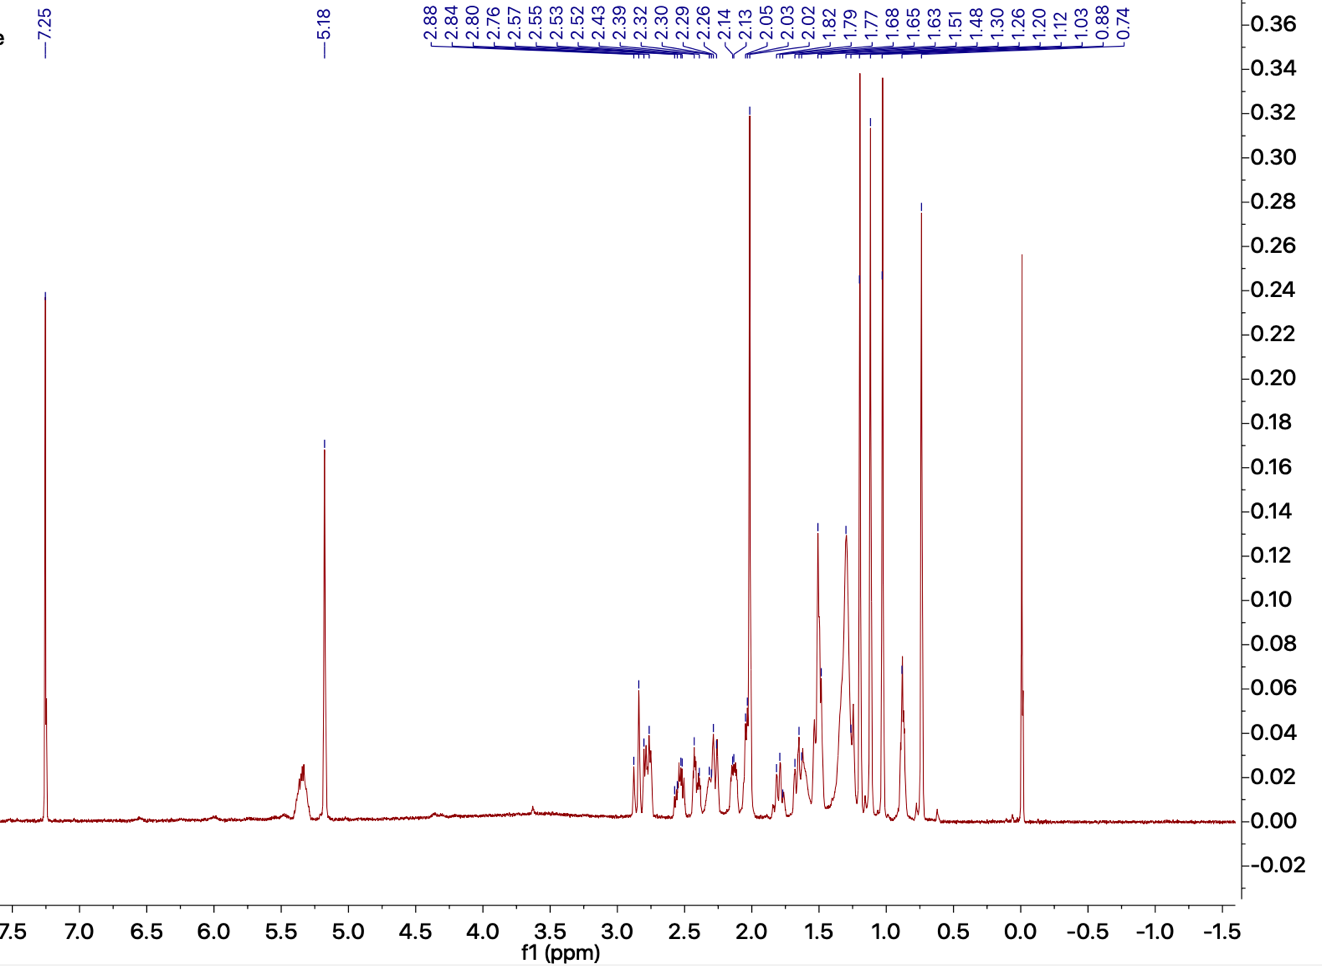
**

**Figure S20**. 1H NMR spectrum of austalide V (**6**)


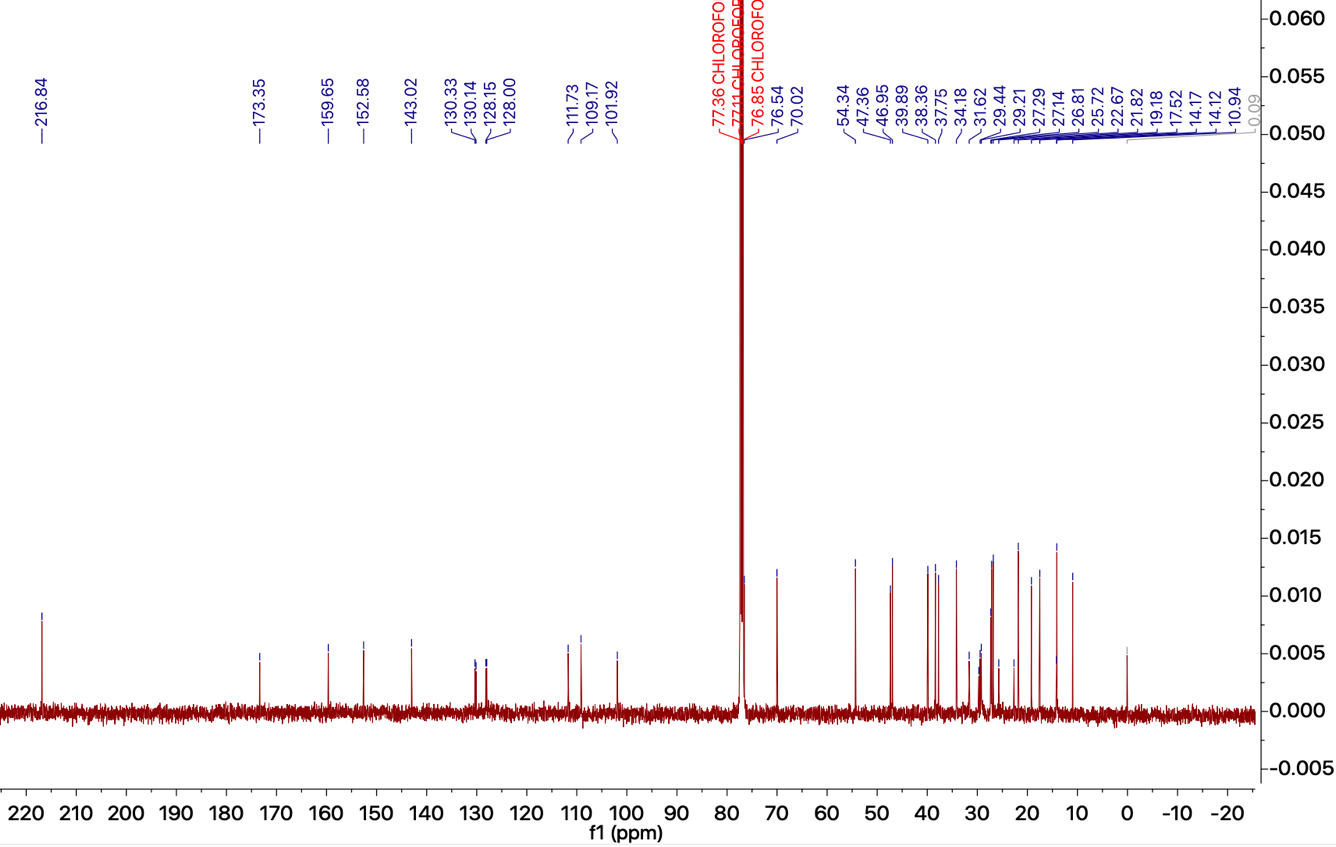


**Figure S21**. 13C NMR spectrum of austalide V (**6**)


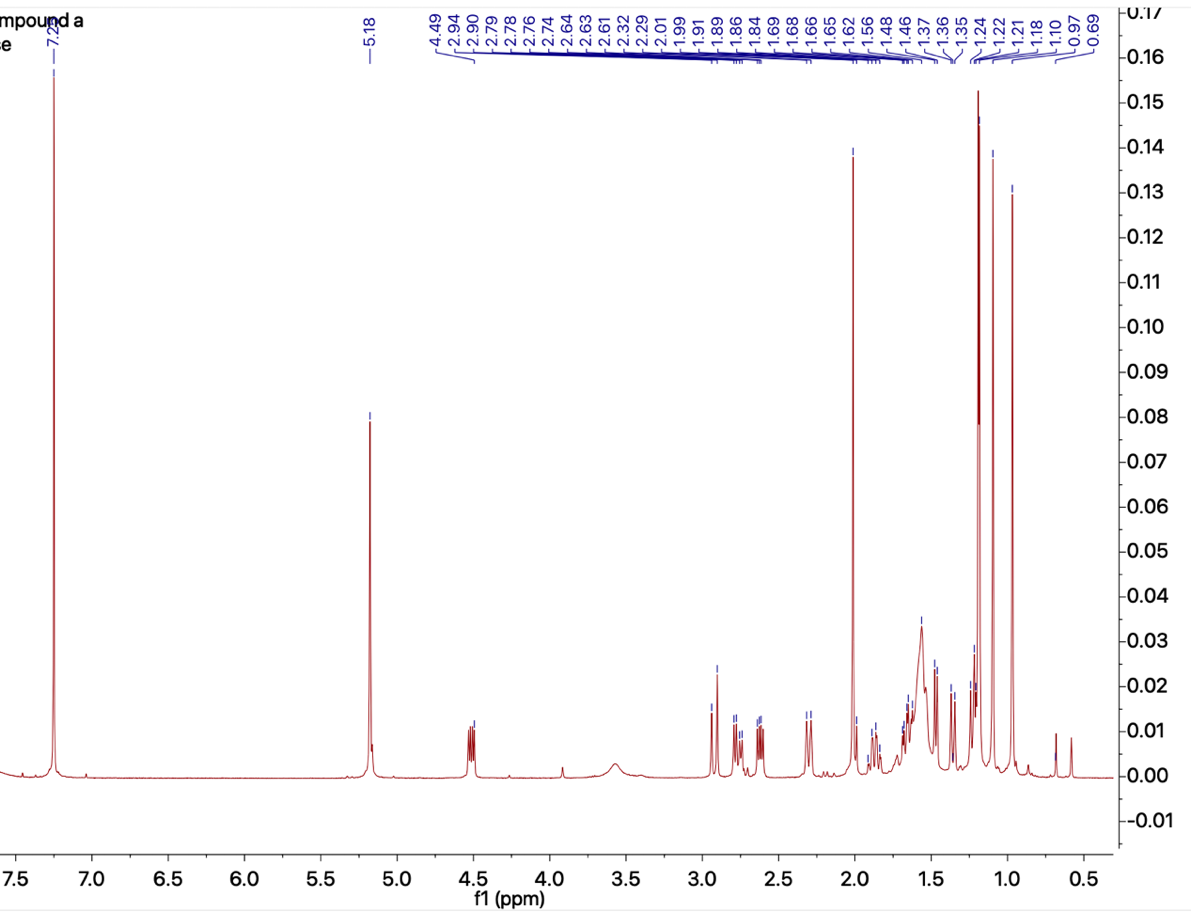


**Figure S22**. 1H NMR spectrum of 2*R*-hydroxyaustalide V (**6’**)


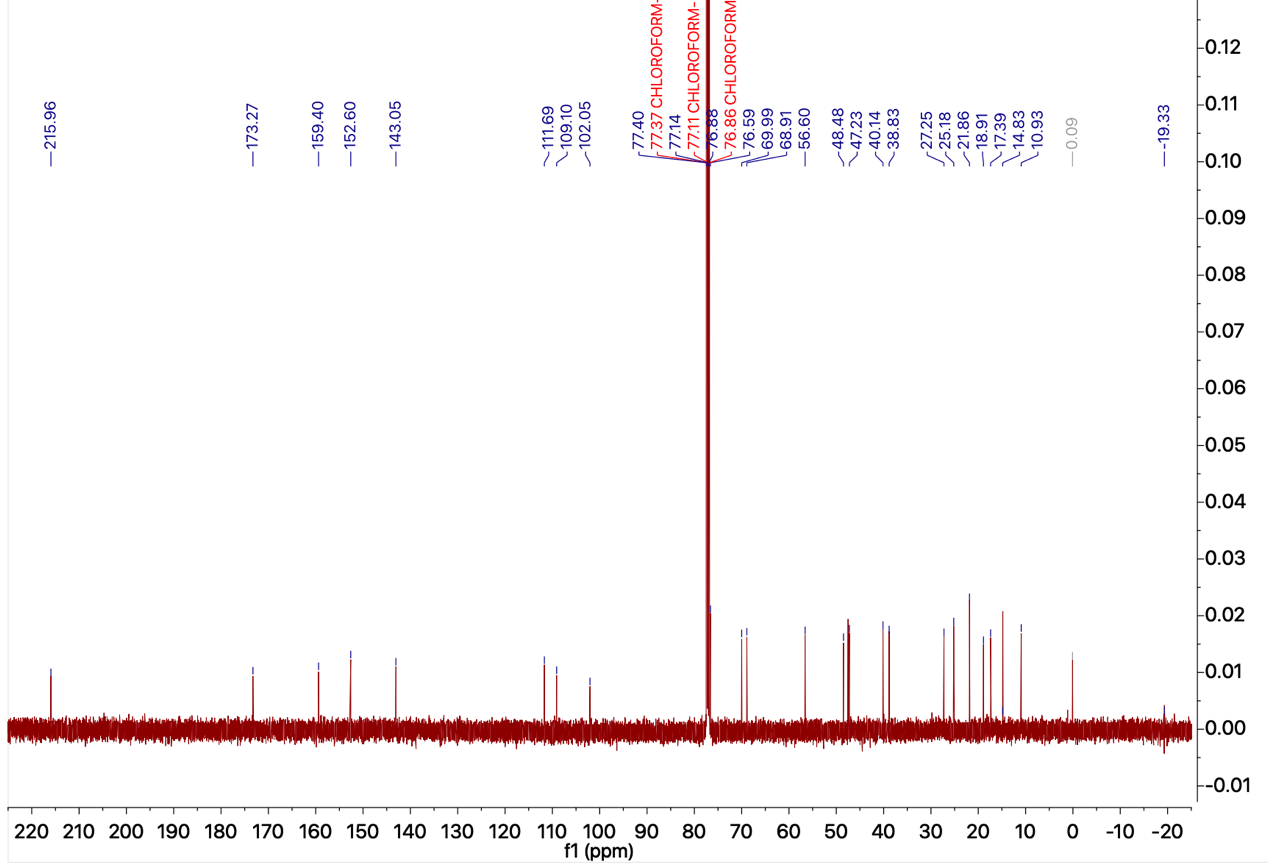


**Figure S23**. 13C NMR spectrum of 2*R*-hydroxyaustalide V (**6’**)


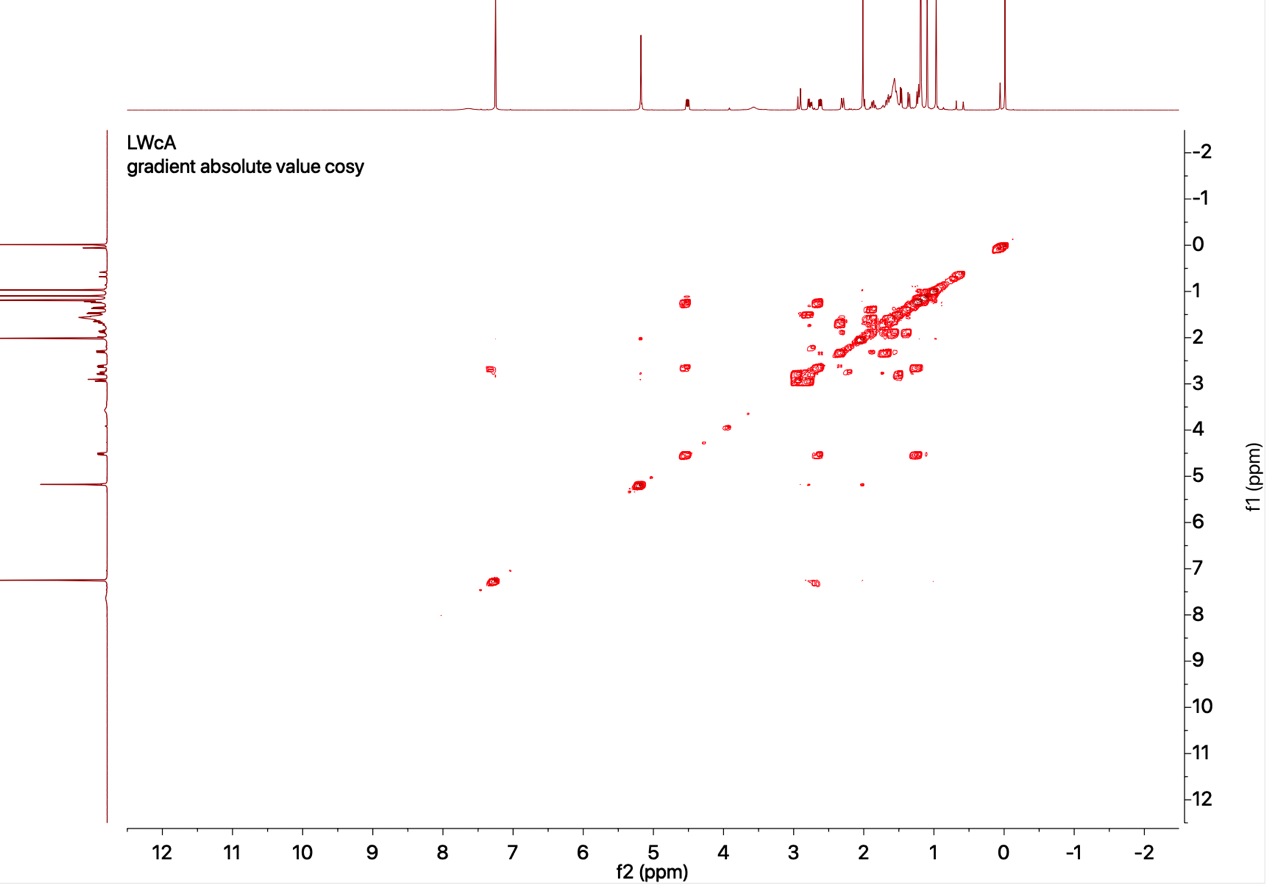


**Figure S24**. 1H-1H COSY spectrum of 2*R*-hydroxyaustalide V (**6’**)


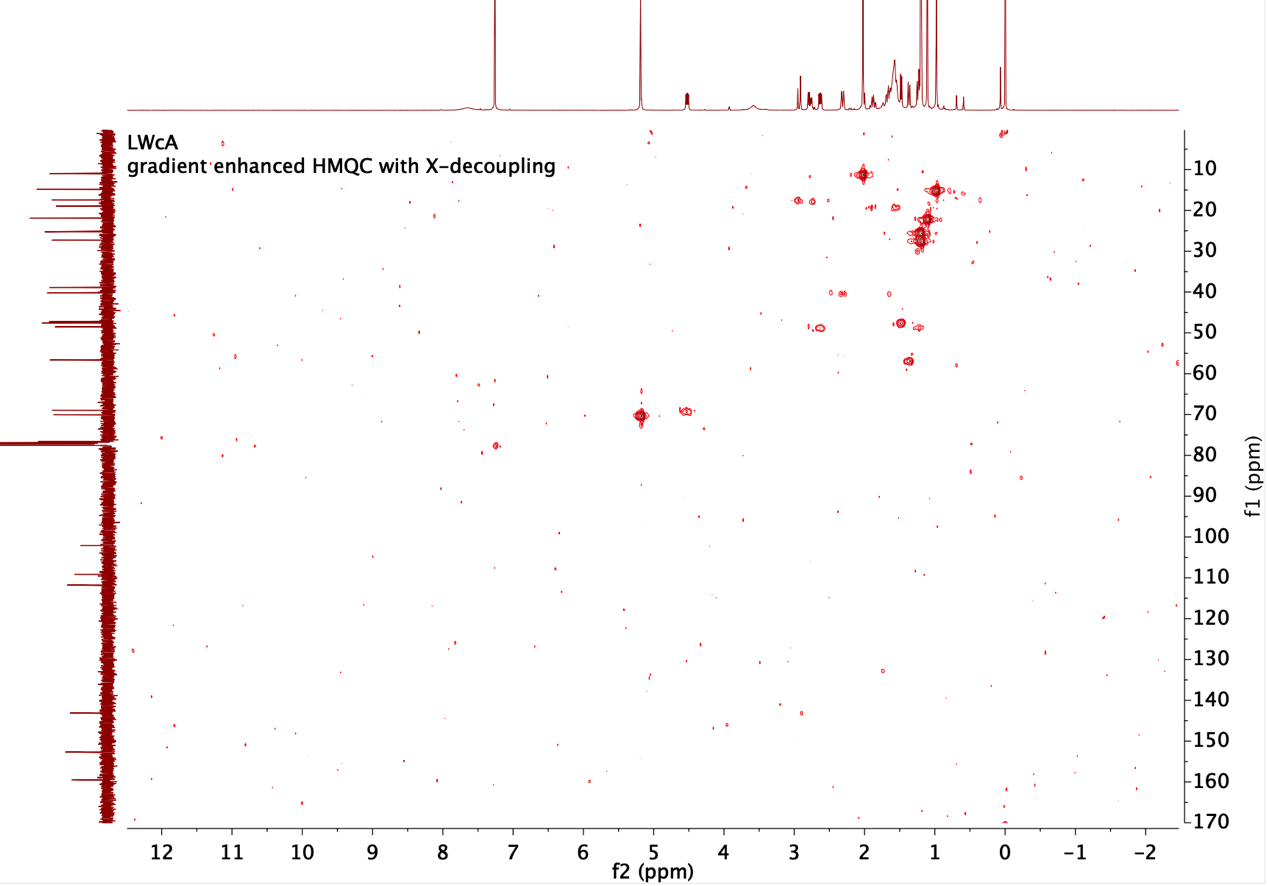


**Figure S25**. HMQC spectrum of 2*R*-hydroxyaustalide V (**6’**)


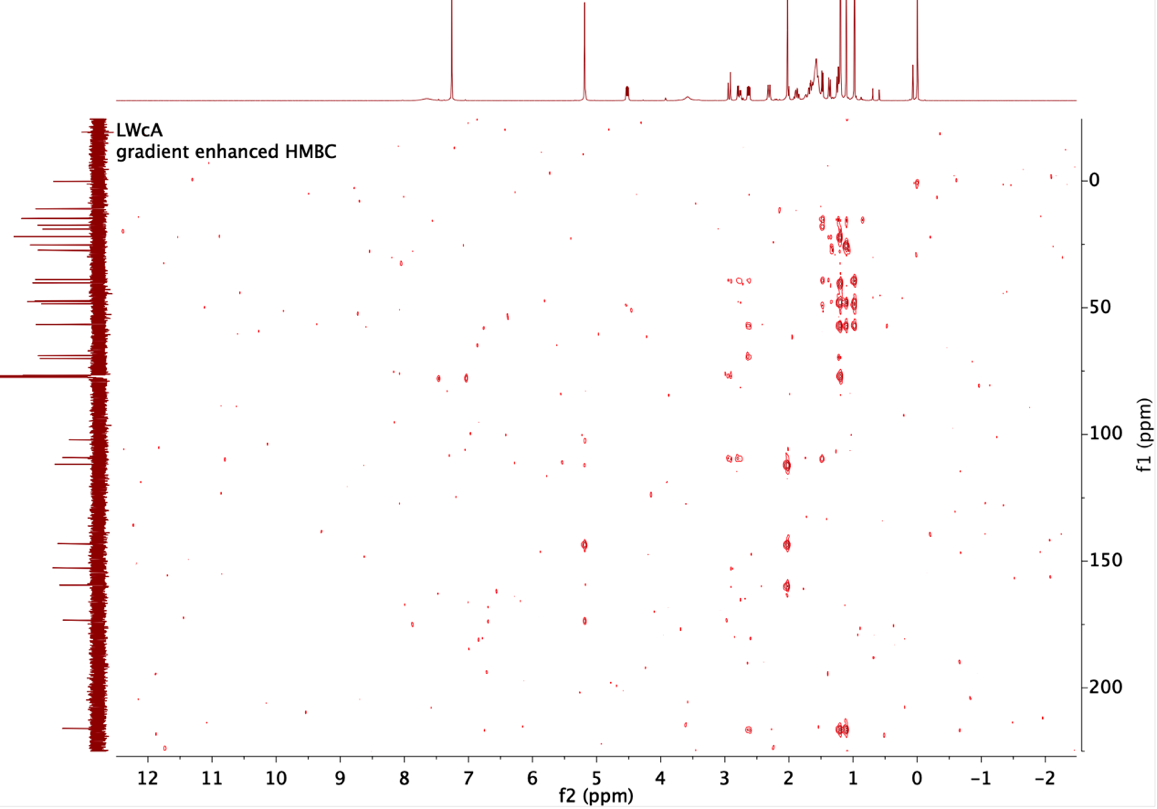


**Figure S26**. HMBC spectrum of 2*R*-hydroxyaustalide V (**6’**)

**Figure S27**. NOESY spectrum of 2*R*-hydroxyaustalide V (**6’**)


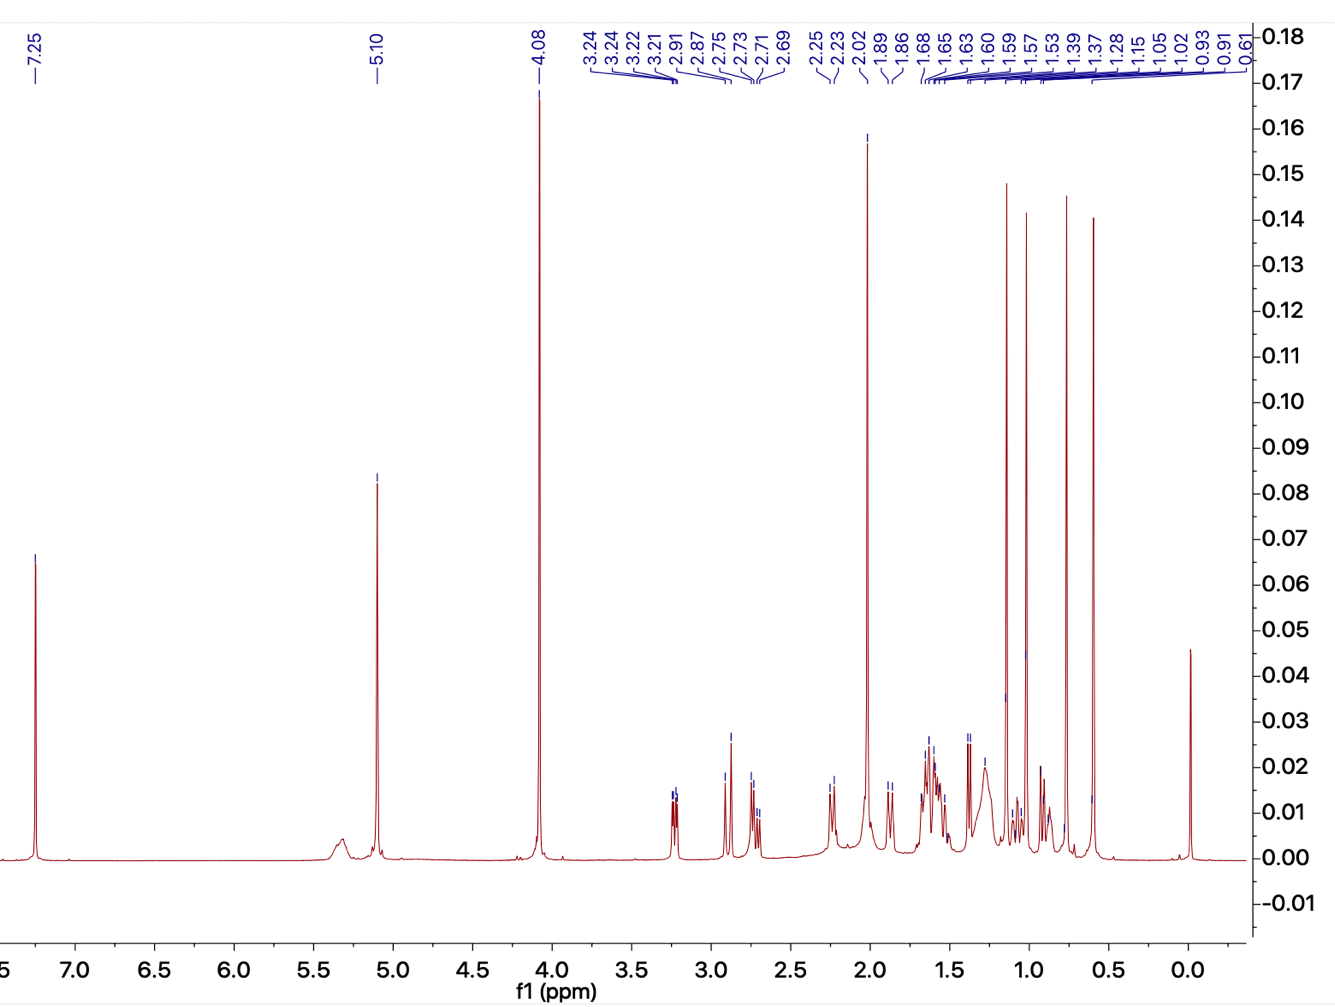


**Figure S28**. 1H NMR spectrum of dihydroaustalide K (**5’**)


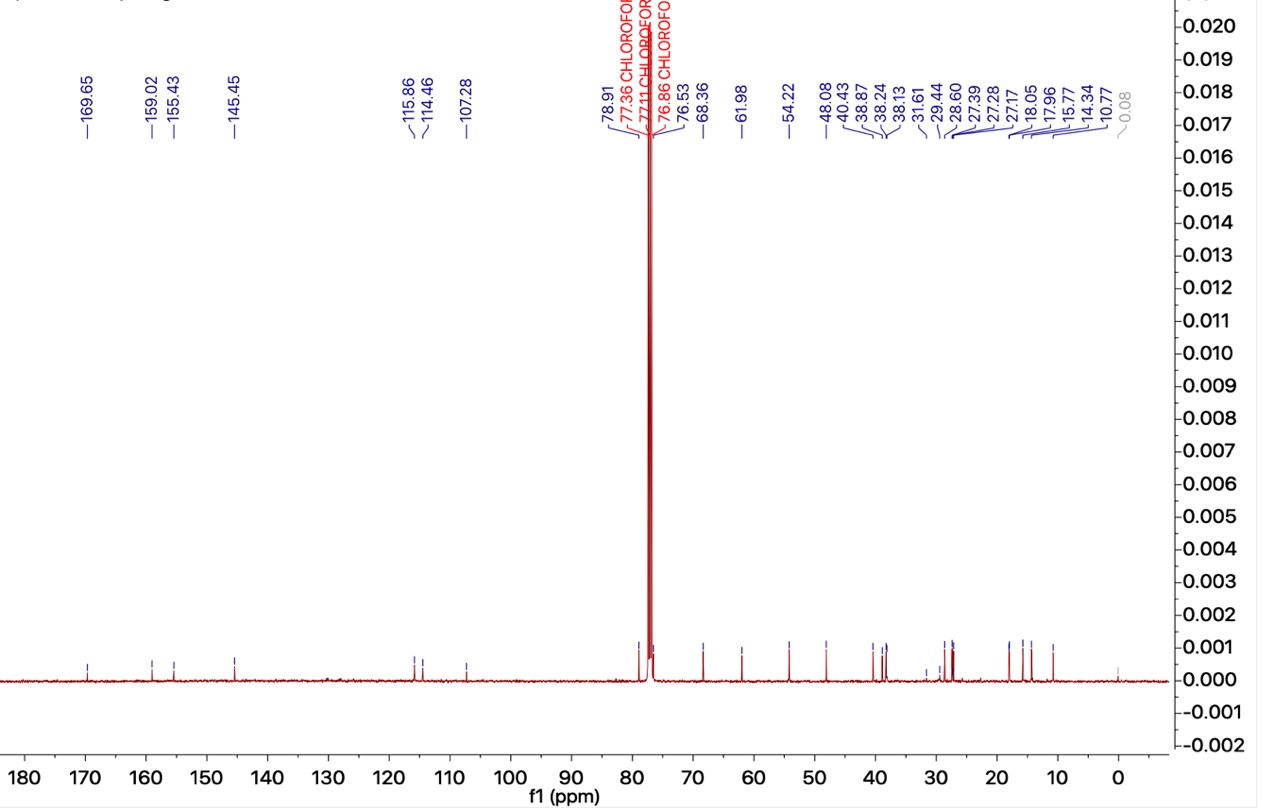


**Figure S29**. 13C NMR spectrum of dihydroaustalide K (**5’**)


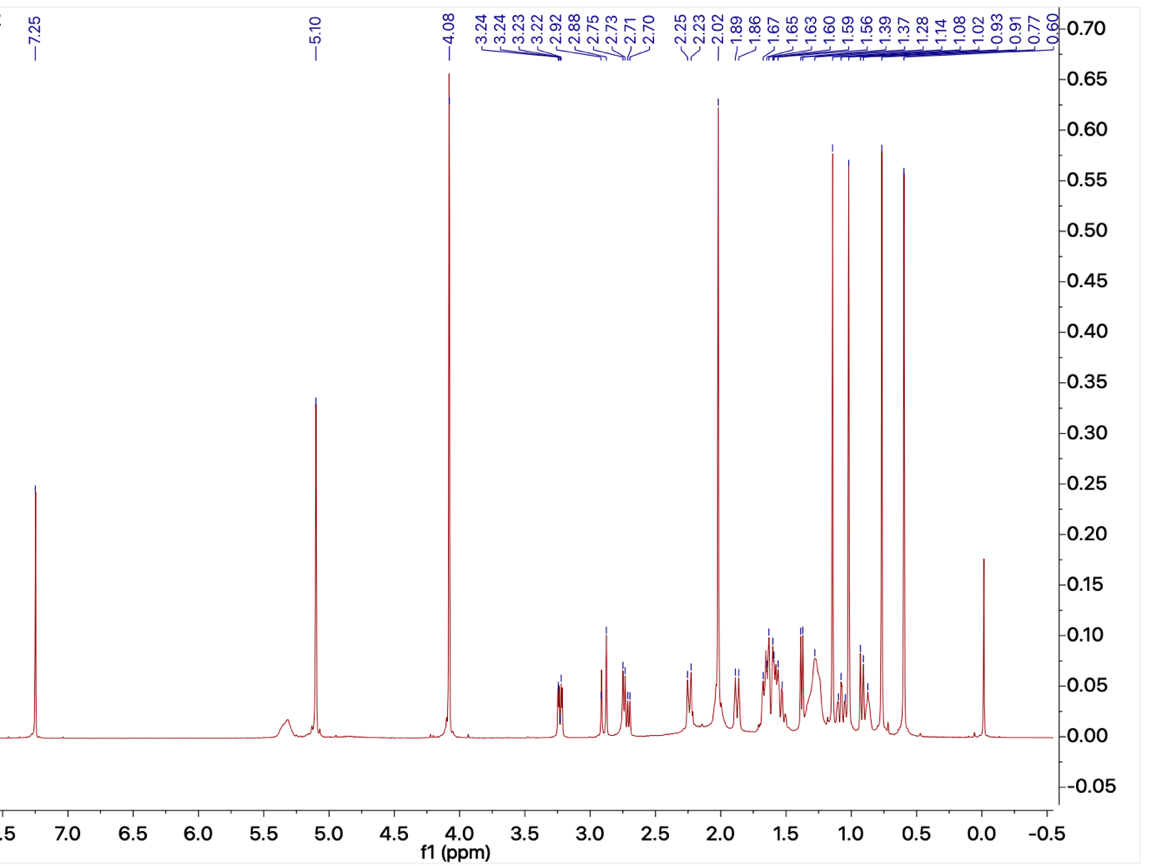


**Figure S30**. 1H NMR spectrum of austalide K (**7**)


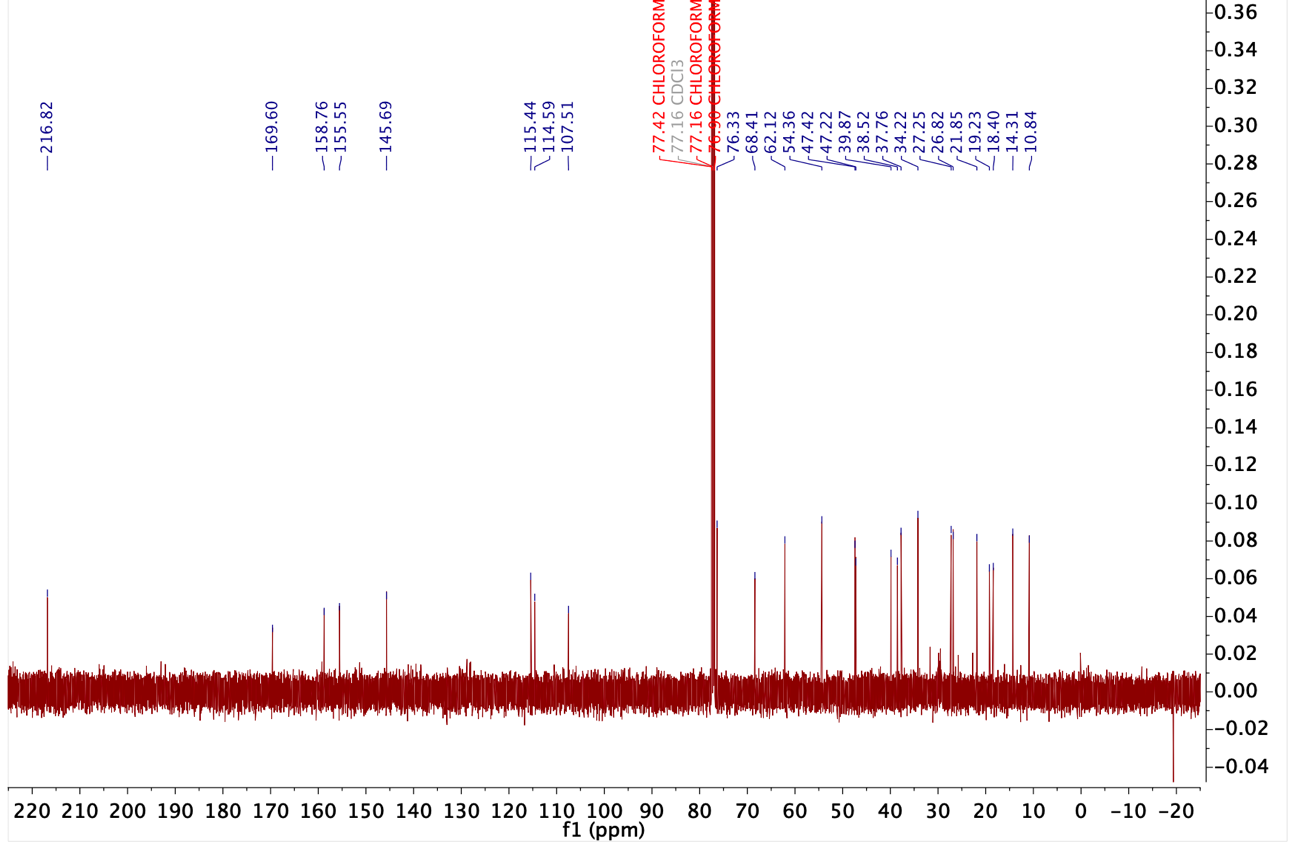


**Figure S31**. 13C NMR spectrum of austalide K (**7**)


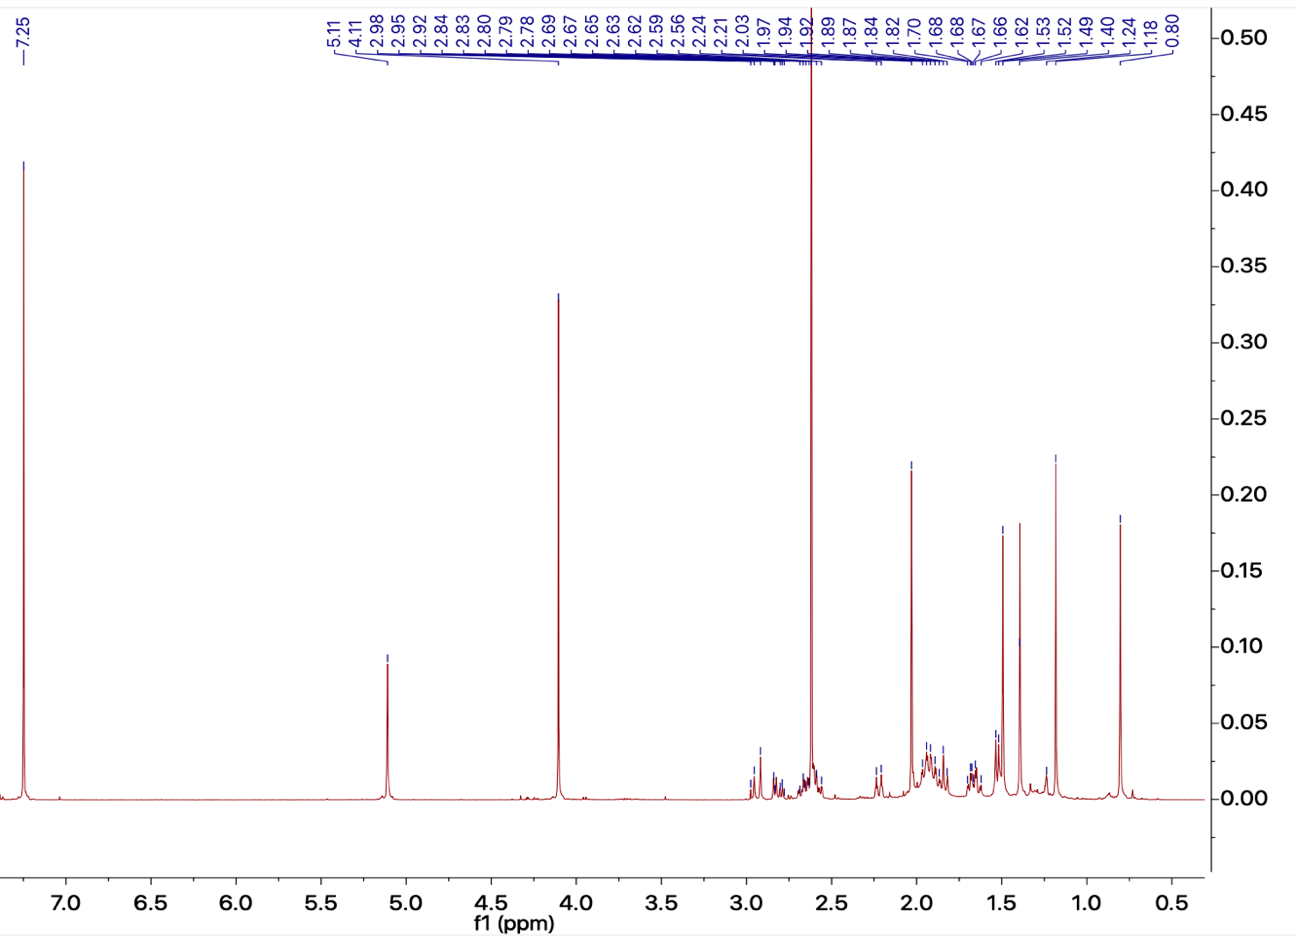


**Figure S32**. 1H NMR spectrum of 13-deacetoxyaustalide I (**8**)


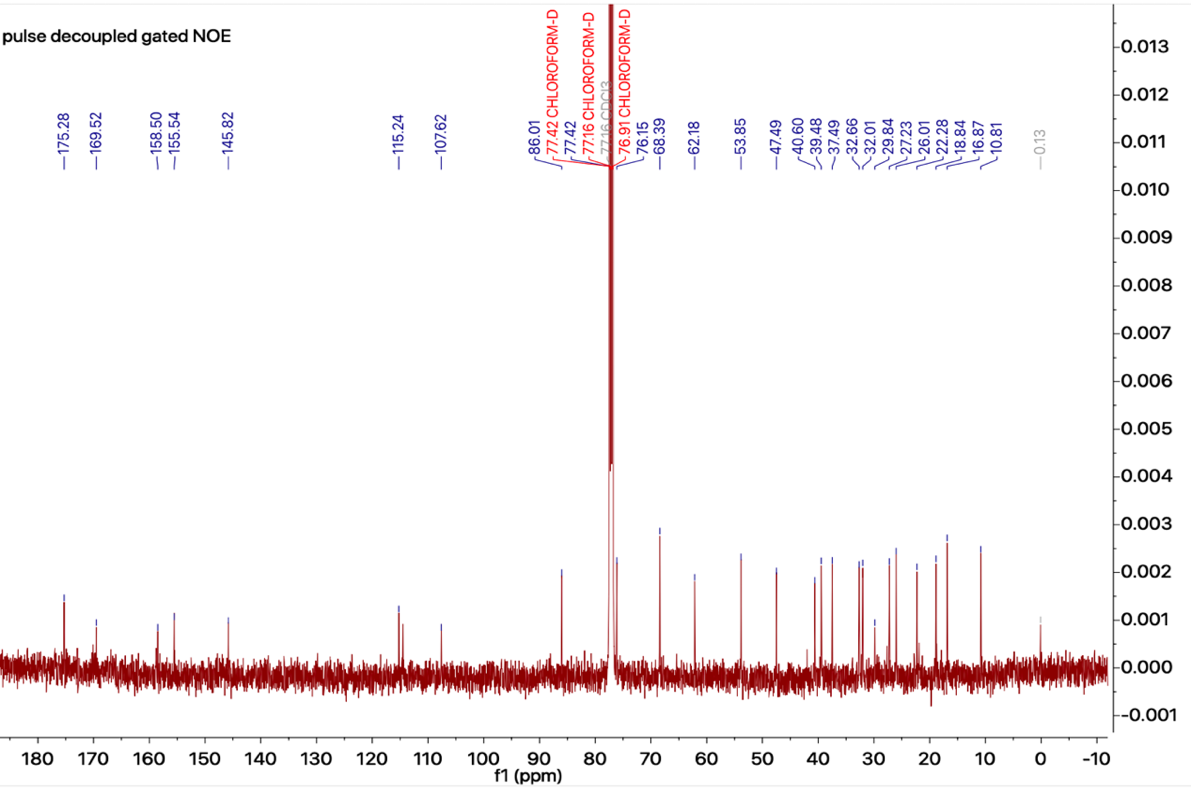


**Figure S33**. 13C NMR spectrum of 13-deacetoxyaustalide I (**8**)


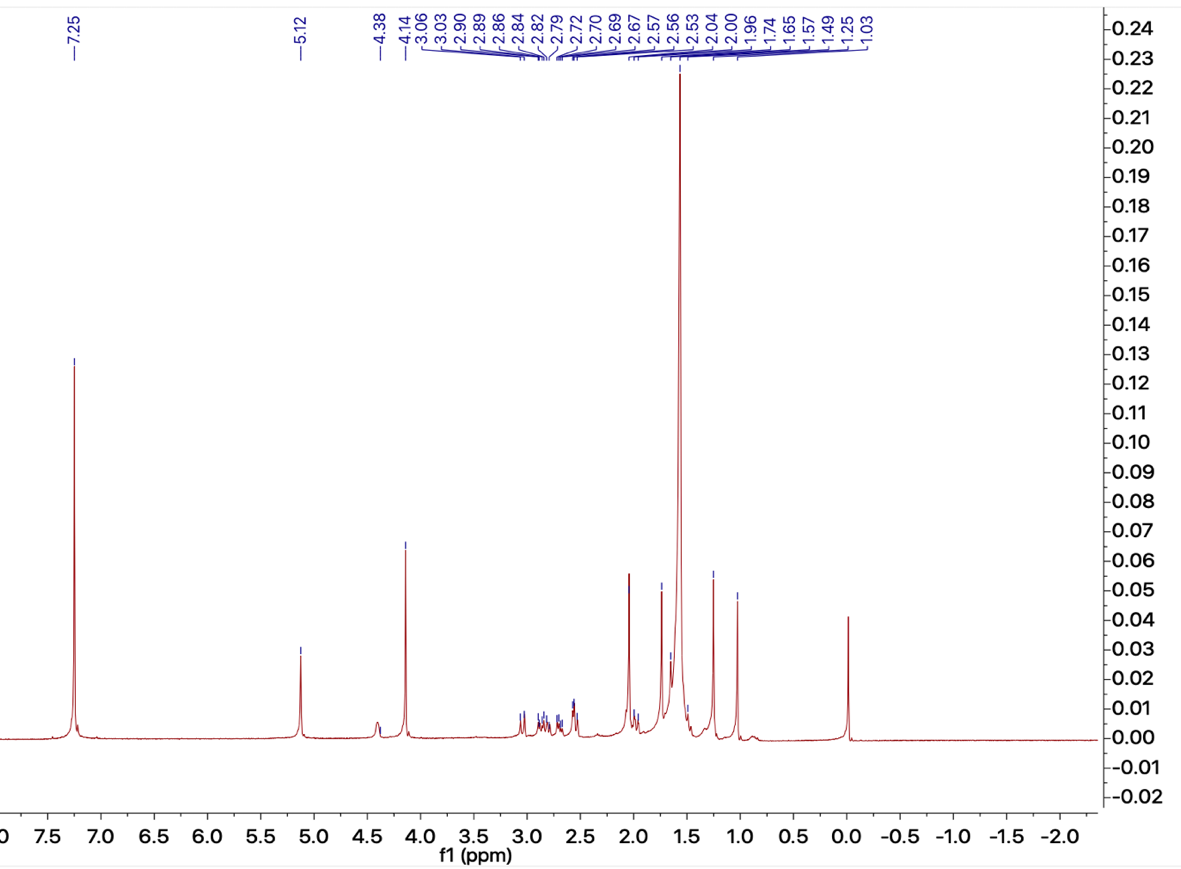


**Figure S34**. 1H NMR spectrum of 13-*O*-deacetylaustalide I (**9**)


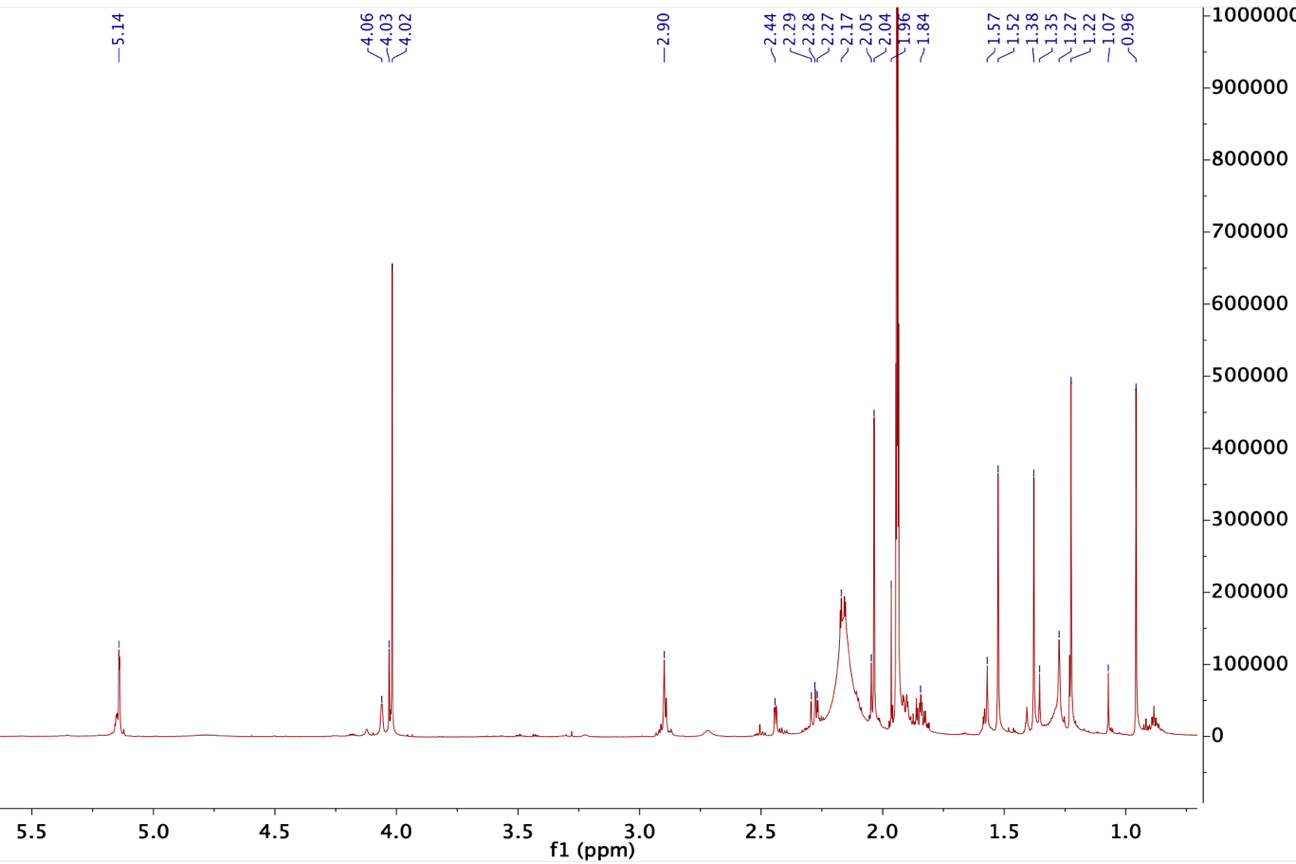


**Figure S35**. 1H NMR spectrum of austalide T (**10**)


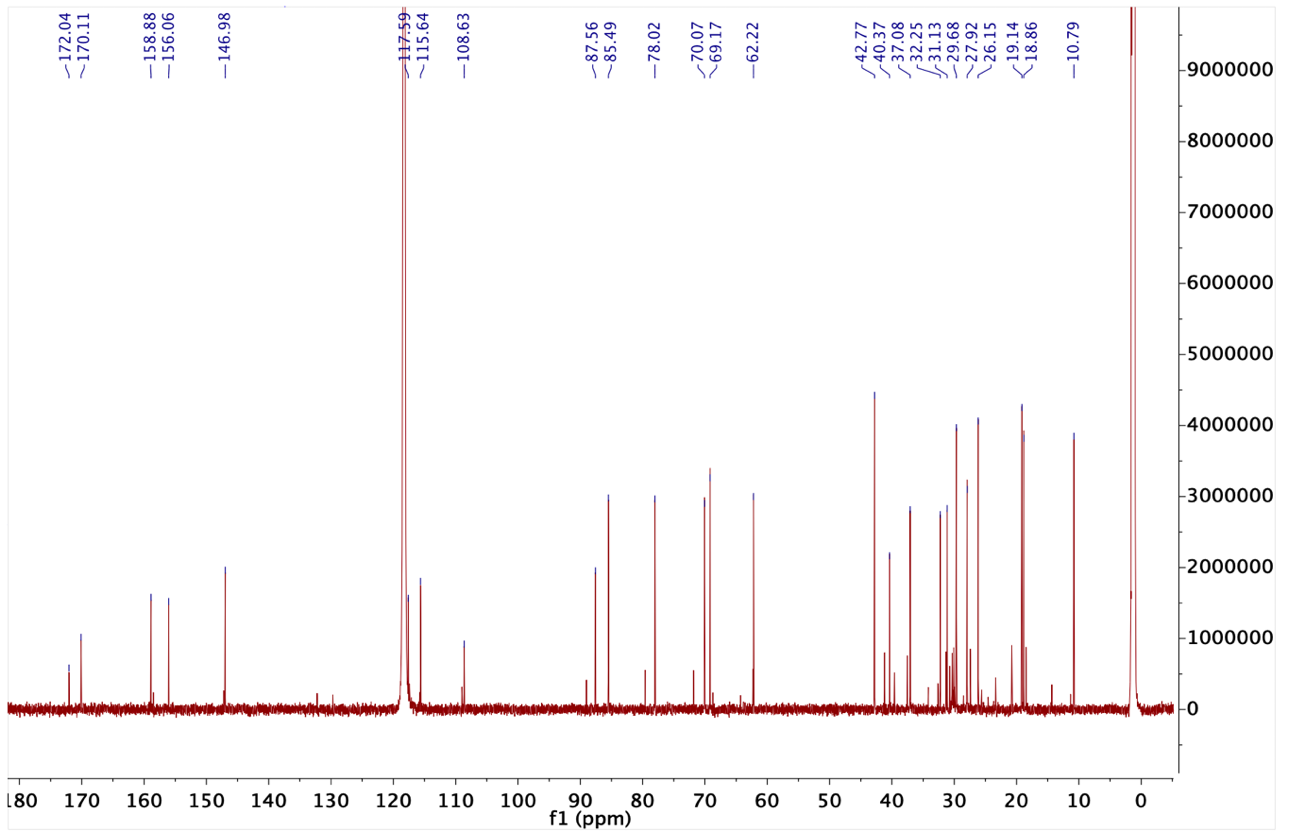


**Figure S36**. 13C NMR spectrum of austalide T (**10**)


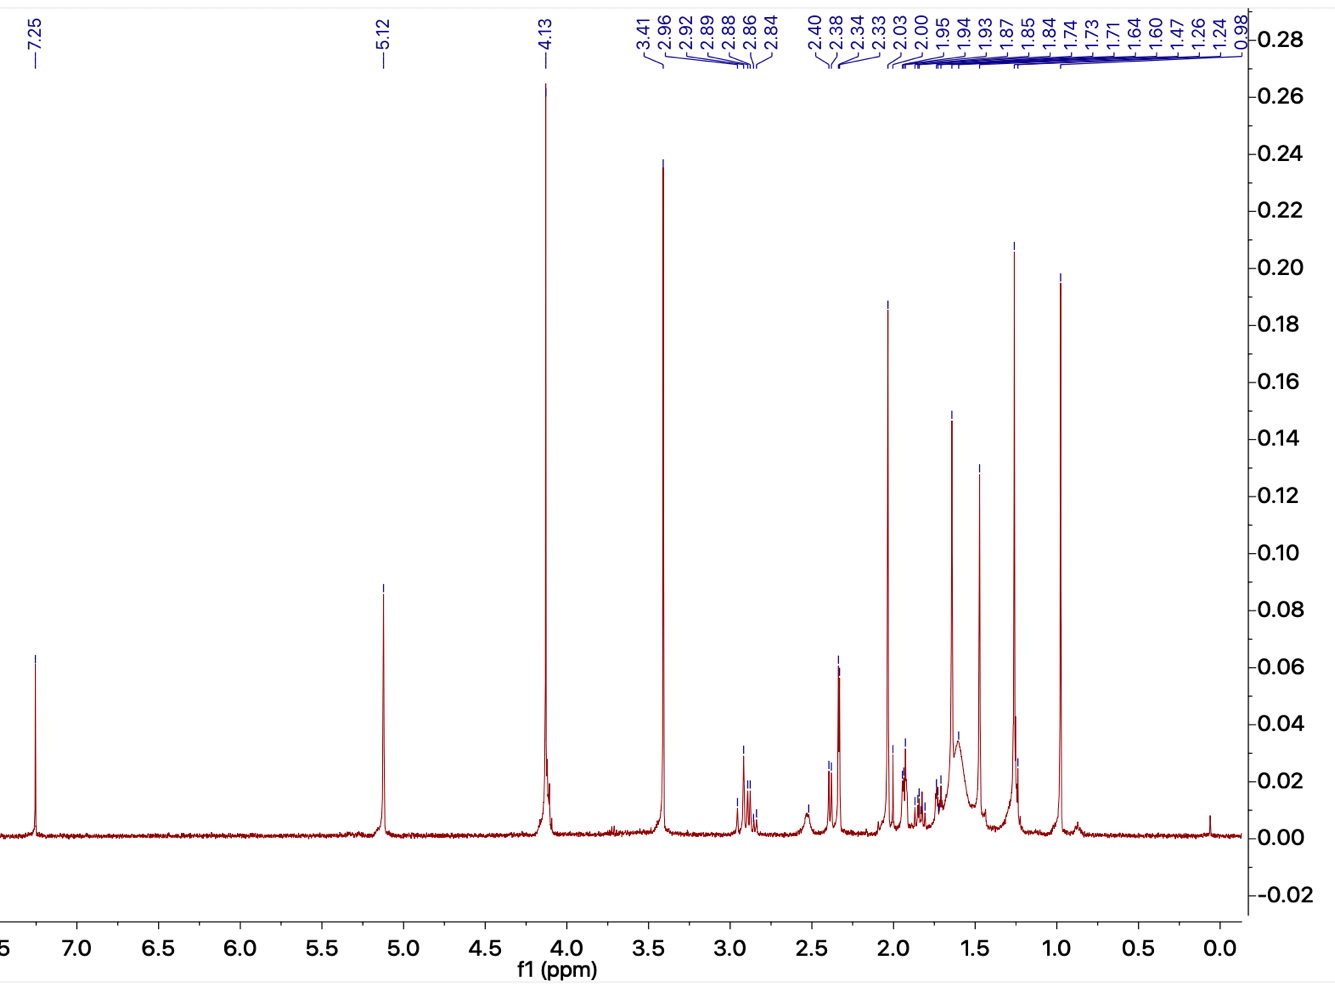


**Figure S37**. 1H NMR spectrum of austalide B (**11**)


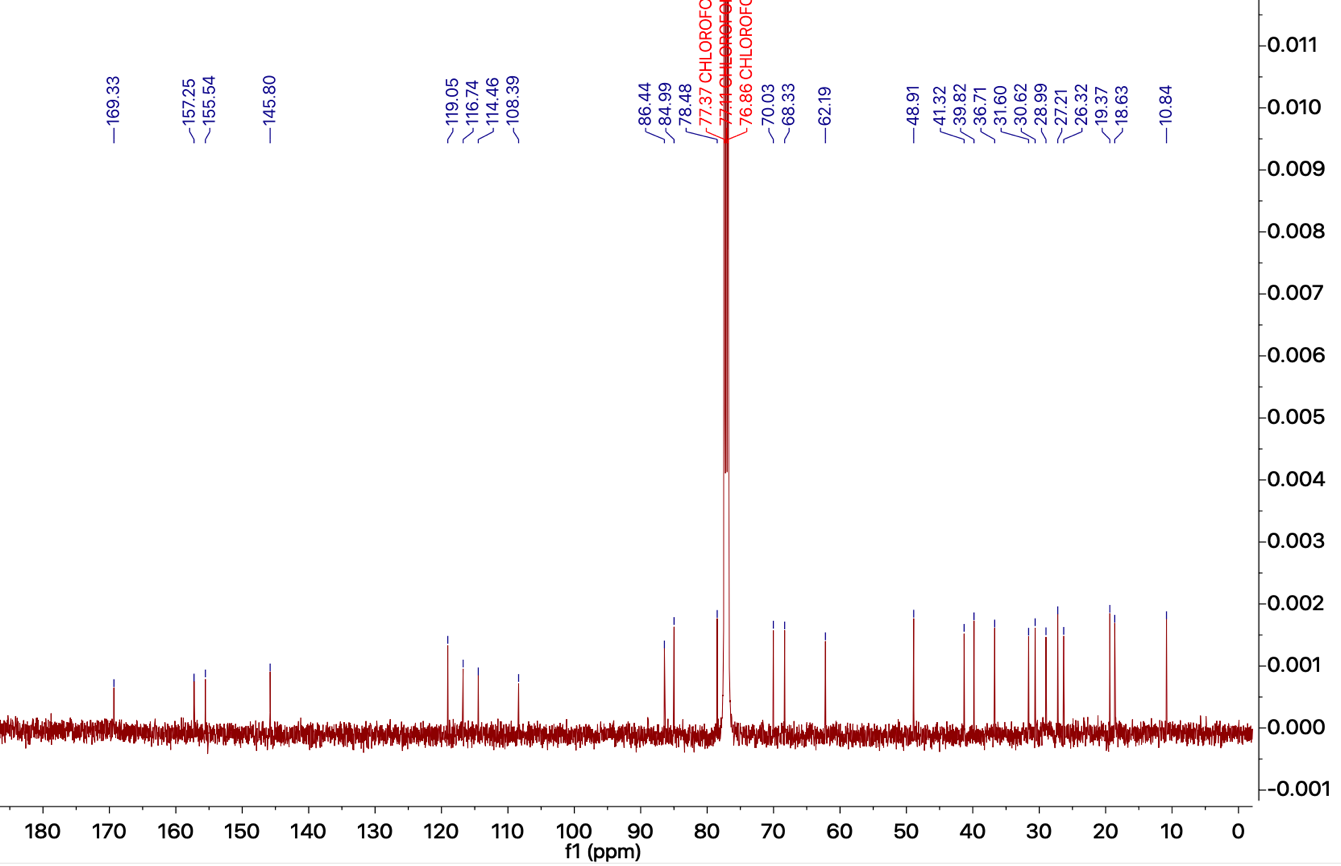


**Figure S38**. 13C NMR spectrum of austalide B (**11**)


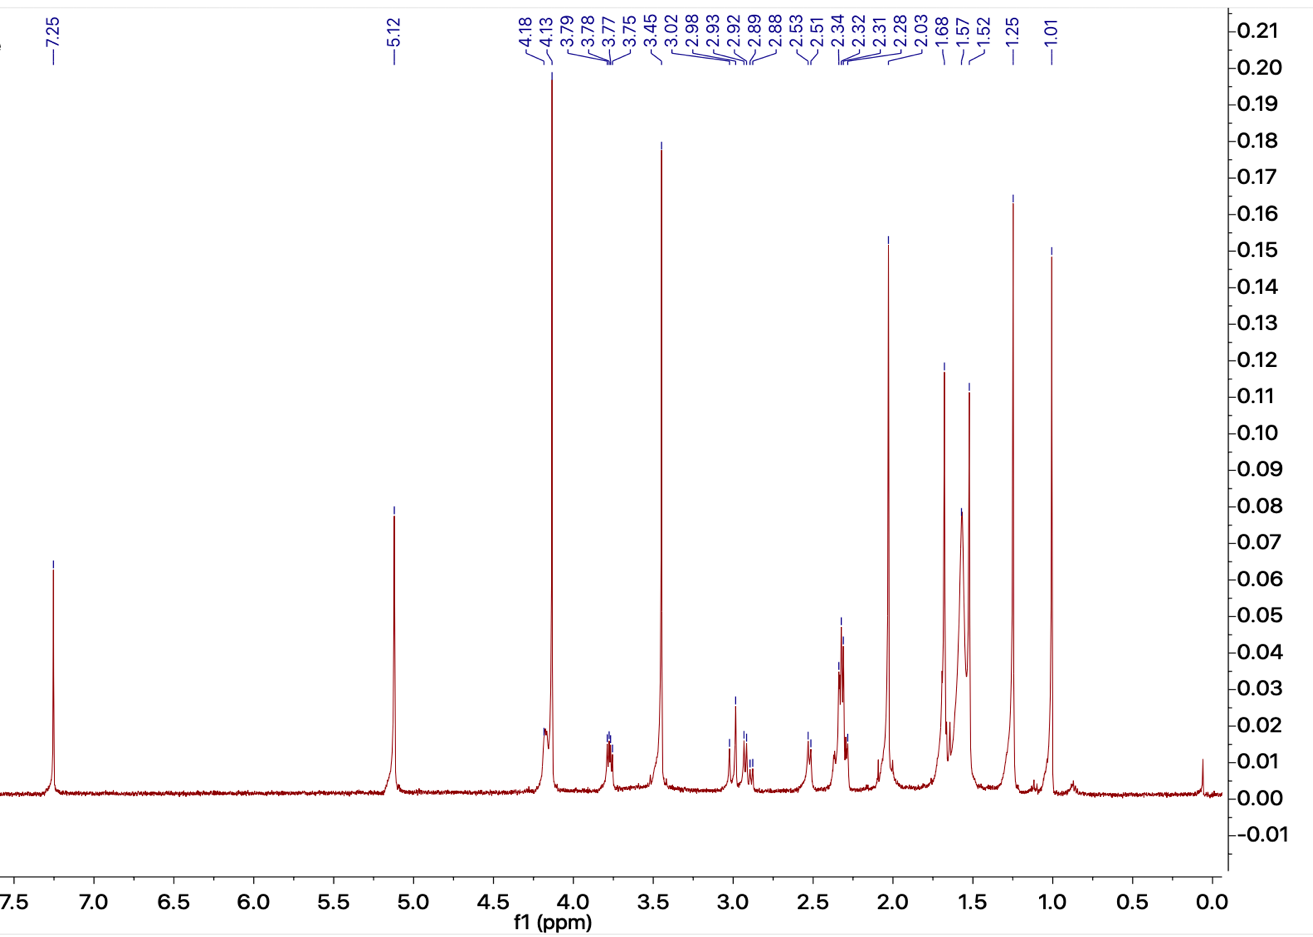


**Figure S39**. 1H NMR spectrum of austalide F (**12**)


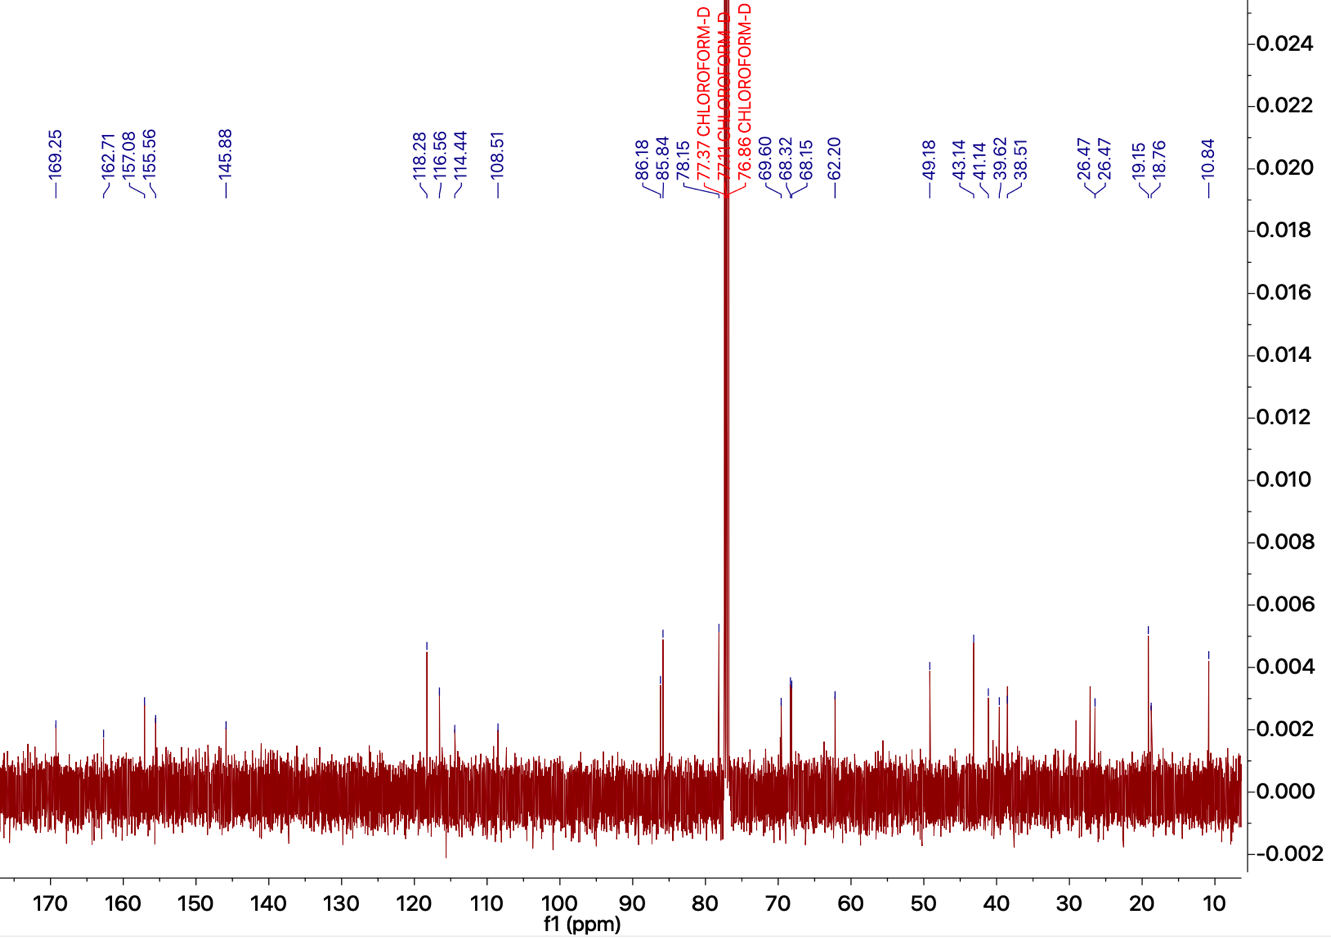


**Figure S40**. 13C NMR spectrum of austalide F (**12**)

**Supplementary reference**

[1] Gao X, Chooi YH, Ames BD, Wang P, Walsh CT, Tang Y. 2011 Fungal indole alkaloid biosynthesis: Genetic and biochemical investigation of the tryptoquialanine pathway in penicillium aethiopicum. *J. Am. Chem. Soc.* **133**, 2729–2741. (doi:10.1021/ja1101085)

[2] Jin FJ, Maruyama JI, Juvvadi PR, Arioka M, Kitamoto K. 2004 Development of a novel quadruple auxotrophic host transformation system by *argB* gene disruption using adeA gene and exploiting adenine auxotrophy in *Aspergillus oryzae*. *FEMS Microbiol. Lett.* **239**, 79–85. (doi:10.1016/j.femsle.2004.08.025)

[3] Fujii T, Yamaoka H, Gomi K, Kitamoto K, Kumagai C. 1995 Cloning and nucleotide sequence of the ribonuclease T1 gene (rntA) from Aspergillus oryzae and its expression in Saccharomyces cerevisiae and Aspergillus oryzae. *Biosci. Biotechnol. Biochem.* **59**, 1869–1874. (doi.org/10.1271/bbb.59.1869)

[4] Yamada O, Lee BR, Gomi K, Iimura Y. 1999 Cloning and functional analysis of the Aspergillus oryzae conidiation regulator gene brlA by its disruption and misscheduled expression. *J. Biosci. Bioeng.* **87**, 424–429. (doi:10.1016/S1389-1723(99)80089-9)

[5] Jin FJ, Maruyama JI, Juvvadi PR, Arioka M, Kitamoto K. 2004 Adenine auxotrophic mutants of Aspergillus oryzae: Development of a novel transformation system with triple auxotrophic hosts. *Biosci. Biotechnol. Biochem.* **68**, 656–662. (doi:10.1271/bbb.68.656)

[6] Matsuda Y, Wakimoto T, Mori T, Awakawa T, Abe I. 2014 Complete biosynthetic pathway of anditomin: Nature’s sophisticated synthetic route to a complex fungal meroterpenoid. *J. Am. Chem. Soc.* **136**, 15326–15336. (doi:10.1021/ja508127q)

[7] Kubodera T, Yamashita N, Nishimura A. 2000 Pyrithiamine Resistance Gene (ptrA) of Aspergillus oryzae: Cloning, Characterization and Application as a Dominant Selectable Marker for Transformation. *Biosci. Biotechnol. Biochem.* **64**, 1416–1421. (doi.org/10.1271/bbb.64.1416)

[8] Ma TK, Parsons PJ, Barrett AGM. 2019 Meroterpenoid Synthesis via Sequential Polyketide Aromatization and Radical Anion Cascade Triene Cyclization: Biomimetic Total Syntheses of Austalide Natural Products. *J. Org. Chem.* **84**, 4961–4970. (doi:10.1021/acs.joc.9b00142)

[9] Peng J, Zhang X, Wang W, Zhu T, Gu Q, Li D. 2016 Austalides S-U, new meroterpenoids from the sponge-derived fungus Aspergillus aureolatus HDN14-107. *Mar. Drugs* **14**, 131–139. (doi:10.3390/md14070131)

[10] Zhuravleva OI *et al.* 2014 Meroterpenoids from the alga-derived fungi Penicillium thomii maire and Penicillium lividum westling. *J. Nat. Prod.* **77**, 1390–1395. (doi:10.1021/np500151b)

[11] Wang W, Lee J, Kim KJ, Sung Y, Park KH, Oh E, Park C, Son YJ, Kang H. 2019 Austalides, Osteoclast Differentiation Inhibitors from a Marine-Derived Strain of the Fungus Penicillium rudallense. *J. Nat. Prod.* **82**, 3083–3088. (doi:10.1021/acs.jnatprod.9b00690)

[12] Wang W, Lee J, Kim KJ, Sung Y, Park KH, Oh E, Park C, Son YJ, Kang H. 2019 Austalides, Osteoclast Differentiation Inhibitors from a Marine-Derived Strain of the Fungus Penicillium rudallense. *J. Nat. Prod.* **82**, 3083–3088. (doi:10.1021/acs.jnatprod.9b00690)

[13] Paquette LA, Wang TZ, Sivik MR. 1994 Total Synthesis of (—)-Austalide B. A Generic Solution to Elaboration of the Pyran/p-Cresol/Butenolide Triad. *J. Am. Chem. Soc.* **116**, 11323–11334. (doi:10.1021/ja00104a012)

[14] Horak RM, Steyn PS, Vleggaar R. 1985 Metabolites of Aspergillus usutus. Part1. Application of the heteronuclear selective population inversion (SPI) N.M.R. Technique to the Structure elucidation of the Austalides A-F, Novel Ortho Ester meroterpenoids. *J. Chem. Soc. Perkin. Trans. 1* , 345–356. (doi:10.1039/P19850000345)

[15] Regueira TB, Kildegaard KR, Hansen BG, Mortensen UH, Hertweck C, Nielsen J. 2011 Molecular basis for mycophenolic acid biosynthesis in *Penicillium brevicompactum*. *Appl. Environ. Microbiol.* **77**, 3035–3043. (doi:10.1128/AEM.03015-10)

[16] Zhang W *et al.* 2015 Functional characterization of MpaG′, the O-methyltransferase involved in the biosynthesis of mycophenolic acid. *ChemBioChem* **16**, 565–569. (doi:10.1002/cbic.201402600

[17] Zhang W *et al.* 2019 Compartmentalized biosynthesis of mycophenolic acid. *Proc. Natl. Acad. Sci. U. S. A.* **116**, 13305–13310. (doi:10.1073/pnas.1821932116)

[18] Matsuda Y, Awakawa T, Wakimoto T, Abe I. 2013 Spiro-ring formation is catalyzed by a multifunctional dioxygenase in austinol biosynthesis. *J. Am. Chem. Soc.* **135**, 10962–10965. (doi:10.1021/ja405518u)

[19] Matsuda Y *et al.* 2018 Novofumigatonin biosynthesis involves a non-heme iron-dependent endoperoxide isomerase for orthoester formation. *Nat. Commun.* **9**, 1–10. (doi:10.1038/s41467-018-04983-2)
